# Supplementary material for: Aroyl-isothiocyanates/isoselenocyanates as precursors to obtain novel cis-3-aroyl-thiourea/urea-β-lactams: design, synthesis, docking and biological evaluation
Source: Royal Society of Chemistry journal article supplement (doi:10.1039/d3nj04485h), 2023-11-16
Supplement: d3nj04485h1.pdf [file d3nj04485h1.pdf]

## **Aroyl-isothiocyanate/isoselenocyanate as precursors to afford novel *cis*-3- aroyl-thiourea/urea-b-lactams: Design, synthesis, docking and biological evaluation**

Pankaj Kumar<sup>a,†</sup>, Jaswinder Kaur<sup>a,†</sup>, Sumeeta Kumari<sup>b</sup>, Sakshi Paliwal<sup>b</sup>, Shiwani Berry<sup>c</sup>, Anil Kumar Pinnaka<sup>b,\*\*</sup>, Aman Bhalla<sup>a,\*</sup>

<sup>a</sup> Department of Chemistry and Centre of Advanced Studies in Chemistry, Panjab University, Chandigarh, 160014, India

<sup>b</sup> Microbial Type Culture Collection and Gene Bank, CSIR-Institute of Microbial Technology, Chandigarh, 160036, India

<sup>c</sup> Department of Chemistry and Chemical Sciences, Central University of Himachal Pradesh, Shahpur Campus, Shahpur, Kangra-176206, HP, India

† These authors contributed equally.

\* Corresponding author.

\*\* Corresponding author.

Email addresses: [amanbhalla@pu.ac.in](mailto:amanbhalla@pu.ac.in), (A. Bhalla), [apinnaka@imtech.res.in](mailto:apinnaka@imtech.res.in), (A. K. Pinnaka)

| Entry | Title                                                                                                                                                        | Page No. |
|-------|--------------------------------------------------------------------------------------------------------------------------------------------------------------|----------|
| 1.    | <sup>1</sup> H, <sup>13</sup> C-NMR and HRMS spectra of <b>5a</b> -(Figure S1, S2)                                                                           | 3-4      |
| 2.    | <sup>1</sup> H, <sup>13</sup> C-NMR and HRMS spectra of <b>5b</b> -(Figure S3, S4)                                                                           | 5-6      |
| 3.    | <sup>1</sup> H, <sup>13</sup> C-NMR and HRMS spectra of <b>5c</b> -(Figure S5, S6)                                                                           | 7-8      |
| 4.    | <sup>1</sup> H and <sup>13</sup> C-NMR of <b>5d</b> -(Figure S7)                                                                                             | 9        |
| 5.    | <sup>1</sup> H, <sup>13</sup> C-NMR and HRMS spectra of <b>5e</b> -(Figure S8, S9)                                                                           | 10-11    |
| 6.    | <sup>1</sup> H and <sup>13</sup> C-NMR spectra of <b>5f</b> -(Figure S10)                                                                                    | 12       |
| 7.    | <sup>1</sup> H, <sup>13</sup> C-NMR and HRMS spectra of <b>8a</b> -(Figure S11, S12)                                                                         | 13-14    |
| 8.    | <sup>1</sup> H, <sup>13</sup> C-NMR and HRMS spectra of <b>8b</b> -(Figure 13, S14)                                                                          | 15-16    |
| 9.    | <sup>1</sup> H, <sup>13</sup> C-NMR and HRMS spectra of <b>8c</b> -(Figure S15, S16)                                                                         | 17-18    |
| 10.   | <sup>1</sup> H, <sup>13</sup> C-NMR and HRMS spectra of <b>8d</b> -(Figure S17, S18)                                                                         | 19-20    |
| 11.   | <sup>1</sup> H, <sup>13</sup> C-NMR and HRMS spectra of <b>8e</b> -(Figure S19, S20)                                                                         | 21-22    |
| 12.   | <sup>1</sup> H, <sup>13</sup> C-NMR and HRMS spectra of <b>8f</b> -(Figure S21, S22)                                                                         | 23-24    |
| 13.   | <sup>1</sup> H and <sup>13</sup> C-NMR spectra of <b>10a</b> -(Figure S23)                                                                                   | 25       |
| 14.   | <sup>1</sup> H and <sup>13</sup> C-NMR spectra of <b>10b</b> -(Figure S24)                                                                                   | 26       |
| 15.   | <sup>1</sup> H and <sup>13</sup> C-NMR spectra of <b>10c</b> -(Figure S25)                                                                                   | 27       |
| 16.   | <sup>1</sup> H and <sup>13</sup> C-NMR spectra of <b>11a</b> -(Figure S26)                                                                                   | 28       |
| 17.   | <sup>1</sup> H and <sup>13</sup> C-NMR spectra of <b>11b</b> -(Figure S27)                                                                                   | 29       |
| 18.   | <sup>1</sup> H and <sup>13</sup> C-NMR spectra of <b>11c</b> -(Figure S28)                                                                                   | 30       |
| 19.   | ADME parameters of <i>cis</i> -3-aryl-thiourea/urea-β-lactams <b>5a-f/8a-f</b> (Figure S29)                                                                  | 31       |
| 20.   | IC50 graphs of <b>5b</b> , <b>5e</b> , <b>8d</b> and <b>8e</b> against <i>S. aureus</i> (Figure S30-S33)                                                     | 32-33    |
| 21.   | IC50 graphs of <b>5b</b> , <b>5e</b> , <b>8c</b> , <b>8d</b> and <b>8e</b> against <i>B. cereus</i> (Figure S34-S38)                                         | 34-35    |
| 22.   | IC50 graphs of <b>5a</b> , <b>5b</b> , <b>5e</b> , <b>8d</b> and <b>8e</b> against <i>P. aeruginosa</i> (Figure S39-S43)                                     | 36-37    |
| 23.   | IC50 graphs of <b>5b</b> , <b>8d</b> and <b>8e</b> against <i>E. coli</i> (Figure S44-S46)                                                                   | 38       |
| 24.   | IC50 graphs of <b>5d</b> , <b>5f</b> , <b>8a</b> , <b>8b</b> , <b>8c</b> , <b>8d</b> , <b>8e</b> and <b>8f</b> against <i>C. albicans</i> (Figure S47-S54)   | 39-41    |
| 25.   | IC50 graphs of <b>5d</b> , <b>5f</b> , <b>8a</b> , <b>8b</b> , <b>8c</b> , <b>8d</b> , <b>8e</b> and <b>8f</b> against <i>C. tropicalis</i> (Figure S55-S62) | 42-44    |

# 1. $^1\text{H}$ , $^{13}\text{C}$ -NMR and HRMS spectra of 3-arylthiourea- $\beta$ -lactams 5a-f

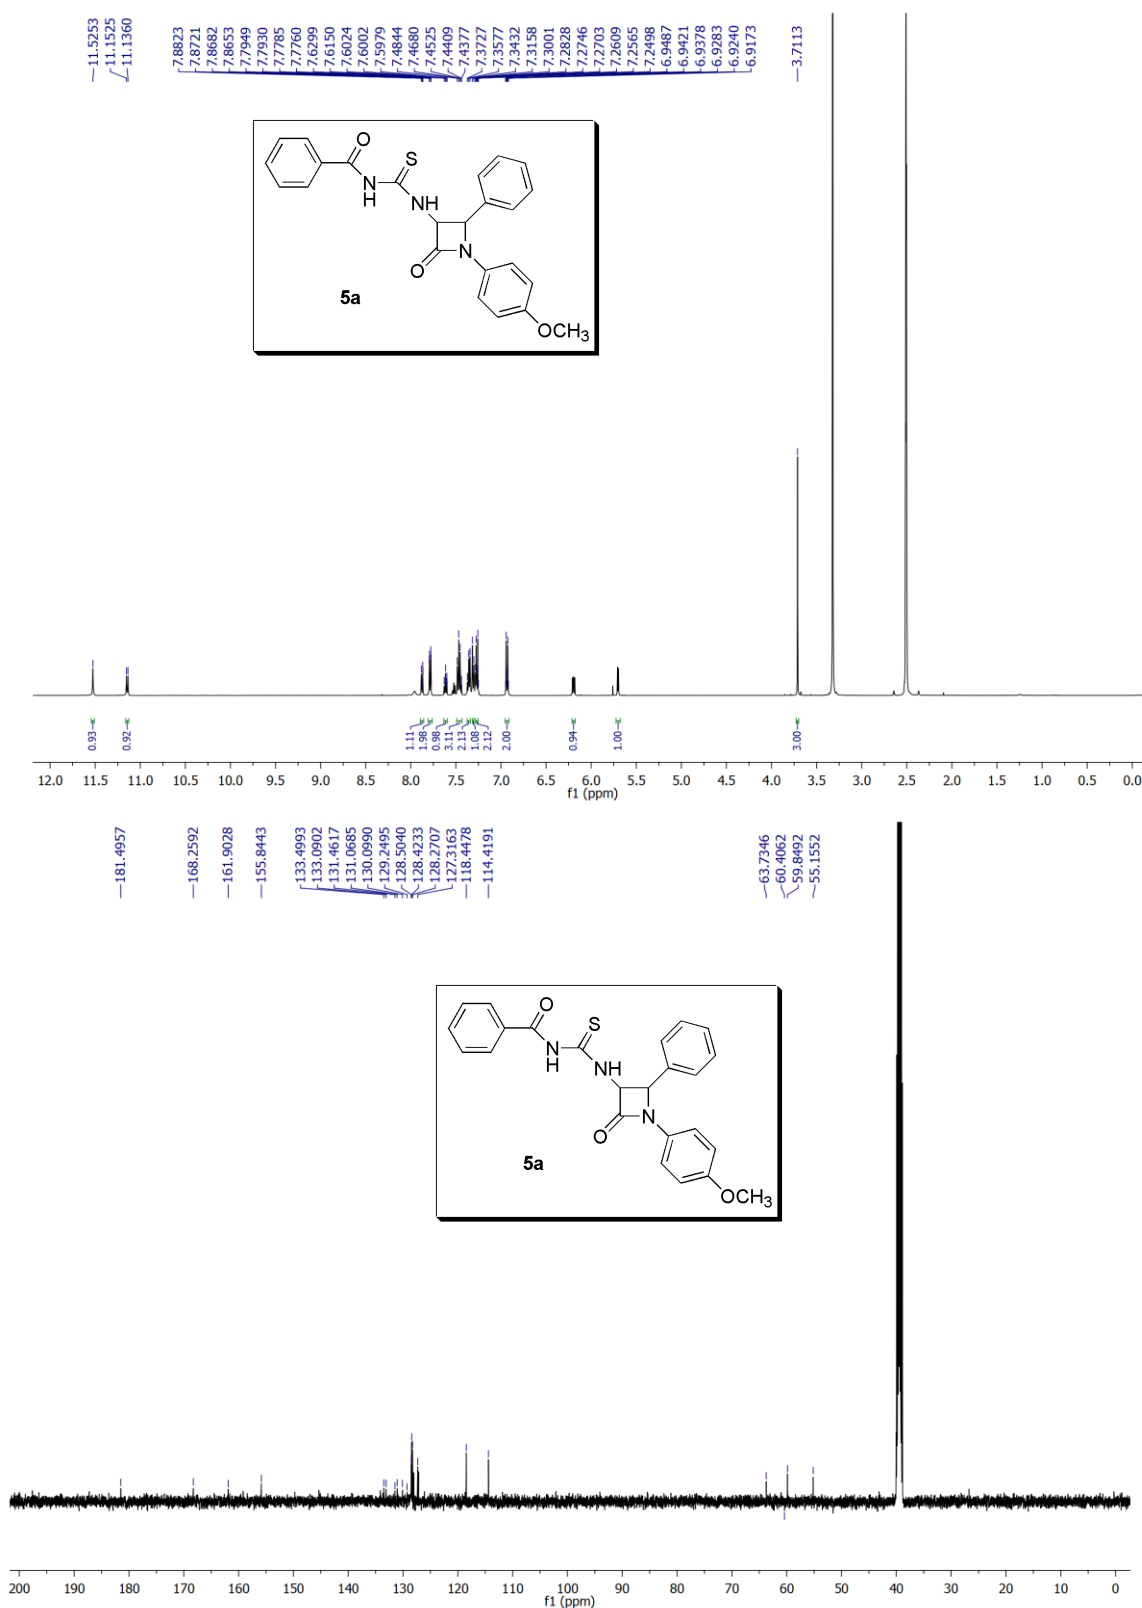

**Figure S1:**  $^1\text{H}$  and  $^{13}\text{C}$ -NMR spectra of 1-Benzoyl-3-[1-(4-methoxy-phenyl)-2-oxo-4-phenyl-azetidin-3-yl]-thiourea **5a** in DMSO

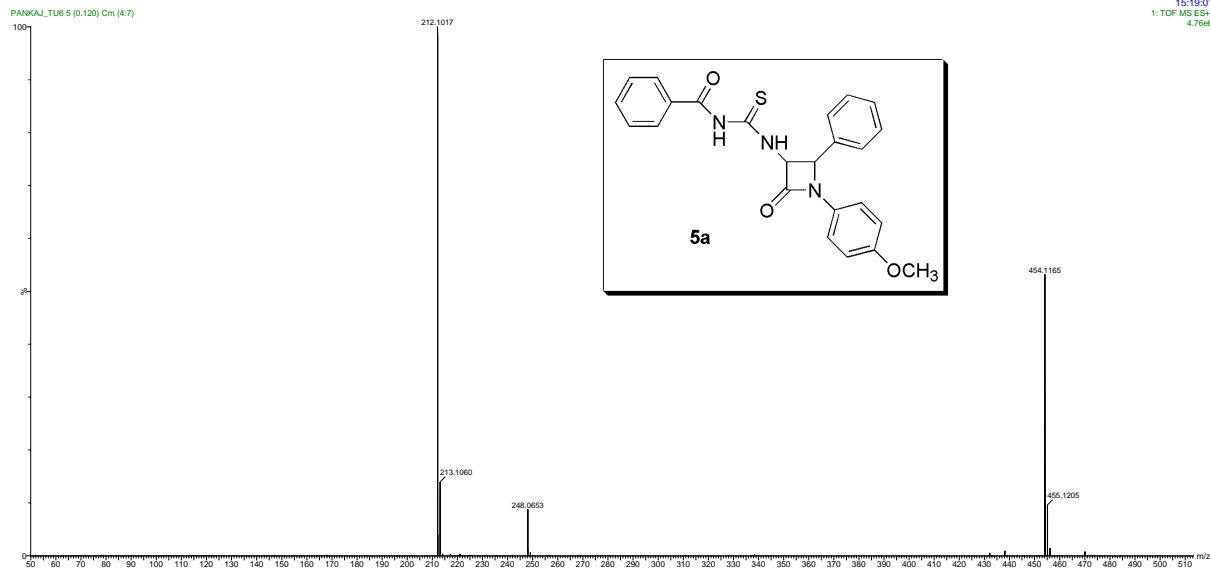

**Figure S2:** HRMS spectra of 1-Benzoyl-3-[1-(4-methoxy-phenyl)-2-oxo-4-phenyl-azetidin-3-yl]-thiourea **5a**

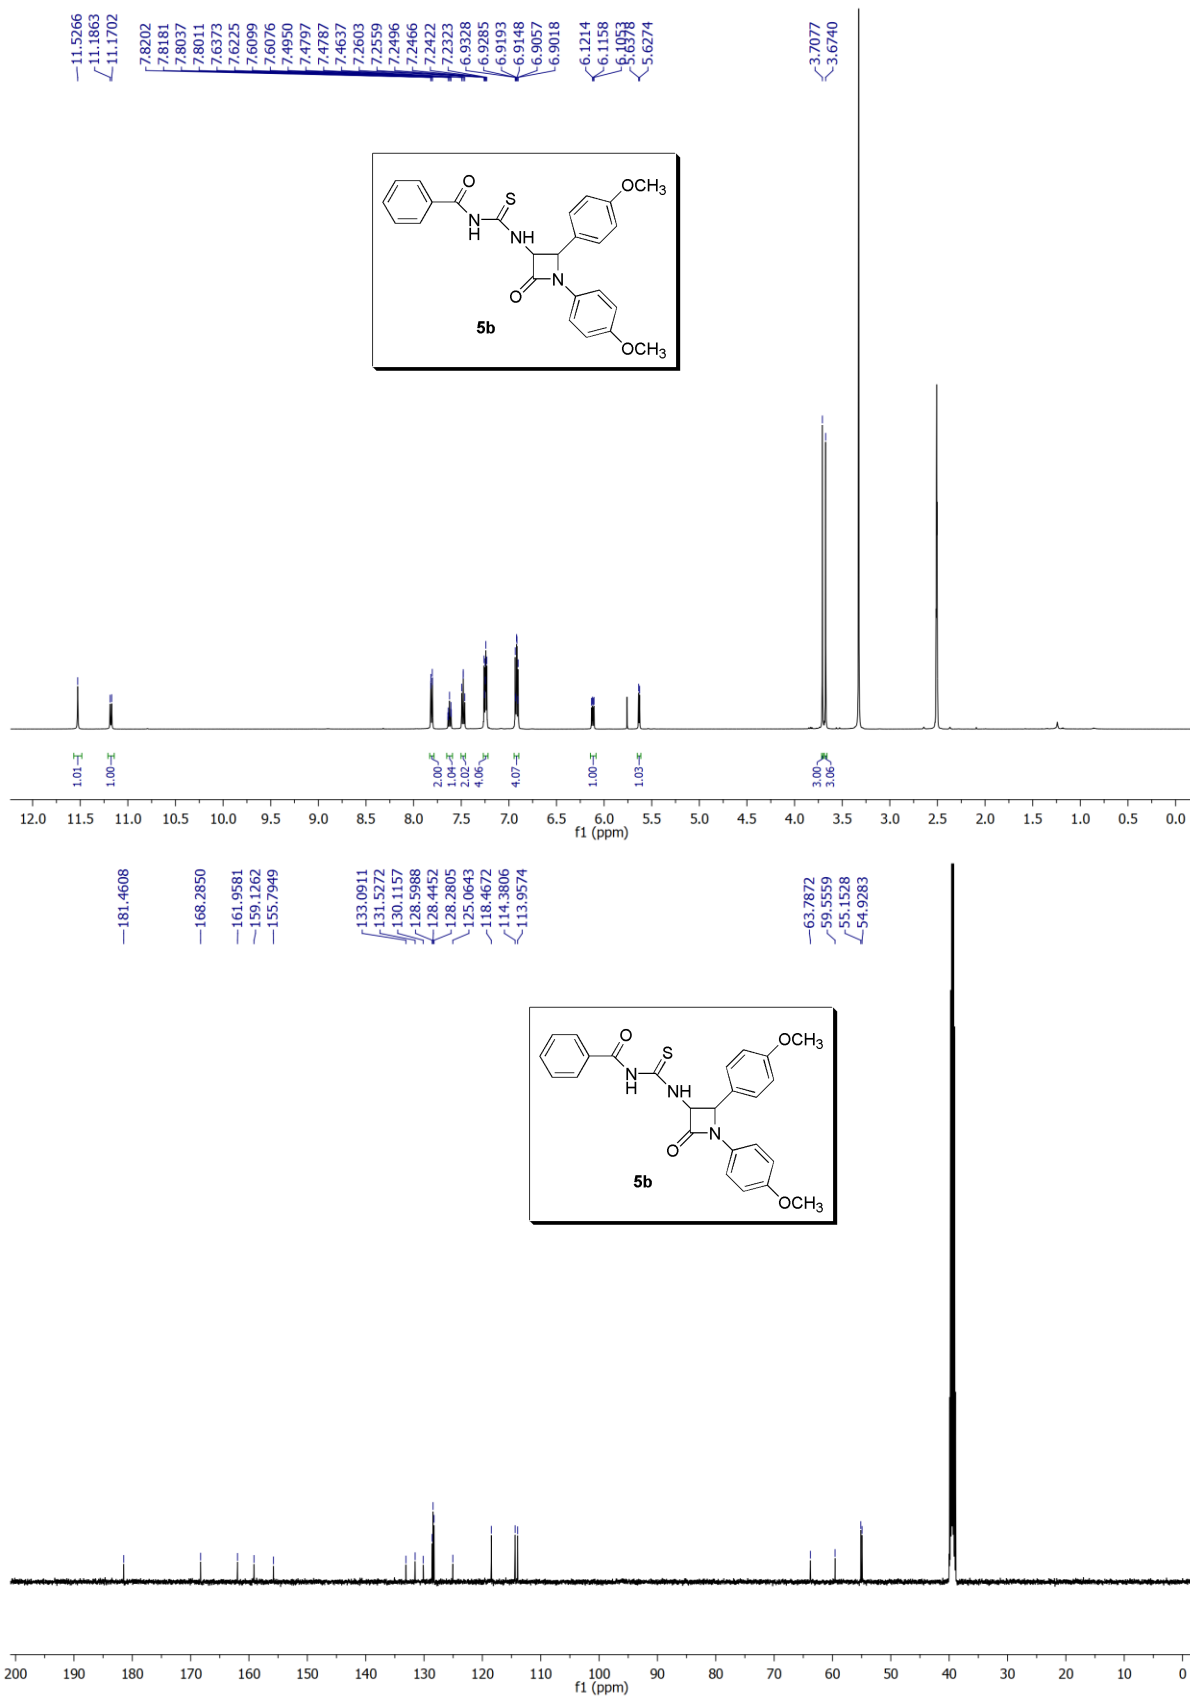

**Figure S3:**  $^1\text{H}$  and  $^{13}\text{C}$ -NMR spectra of 1-Benzoyl-3-[1,2-bis-(4-methoxy-phenyl)-4-oxo-azetidin-3-yl]-thiourea **5b** in DMSO

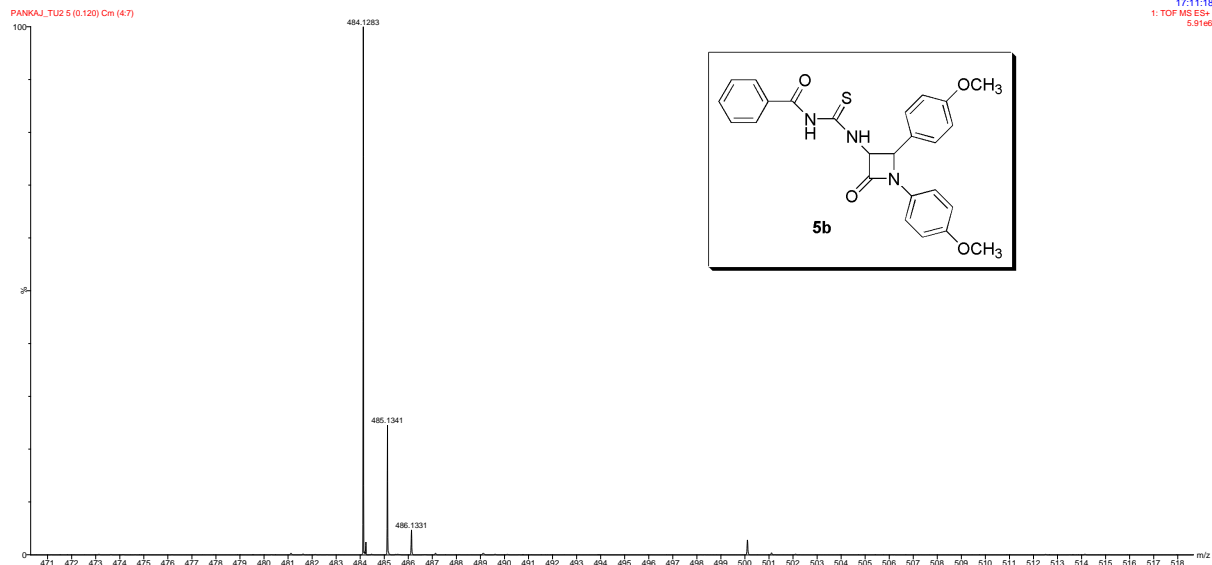

**Figure S4:** HRMS spectra of 1-Benzoyl-3-[1,2-bis-(4-methoxy-phenyl)-4-oxo-azetidin-3-yl]-thiourea **5b**

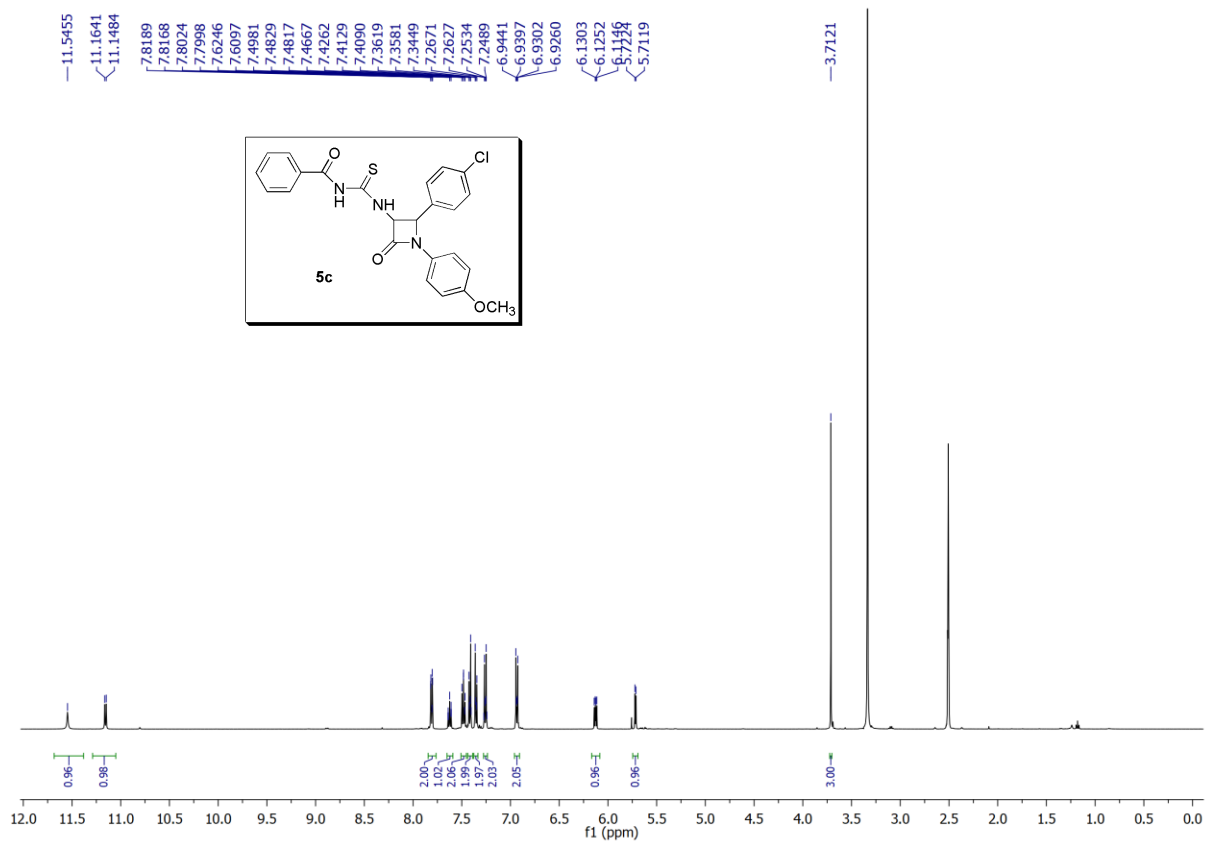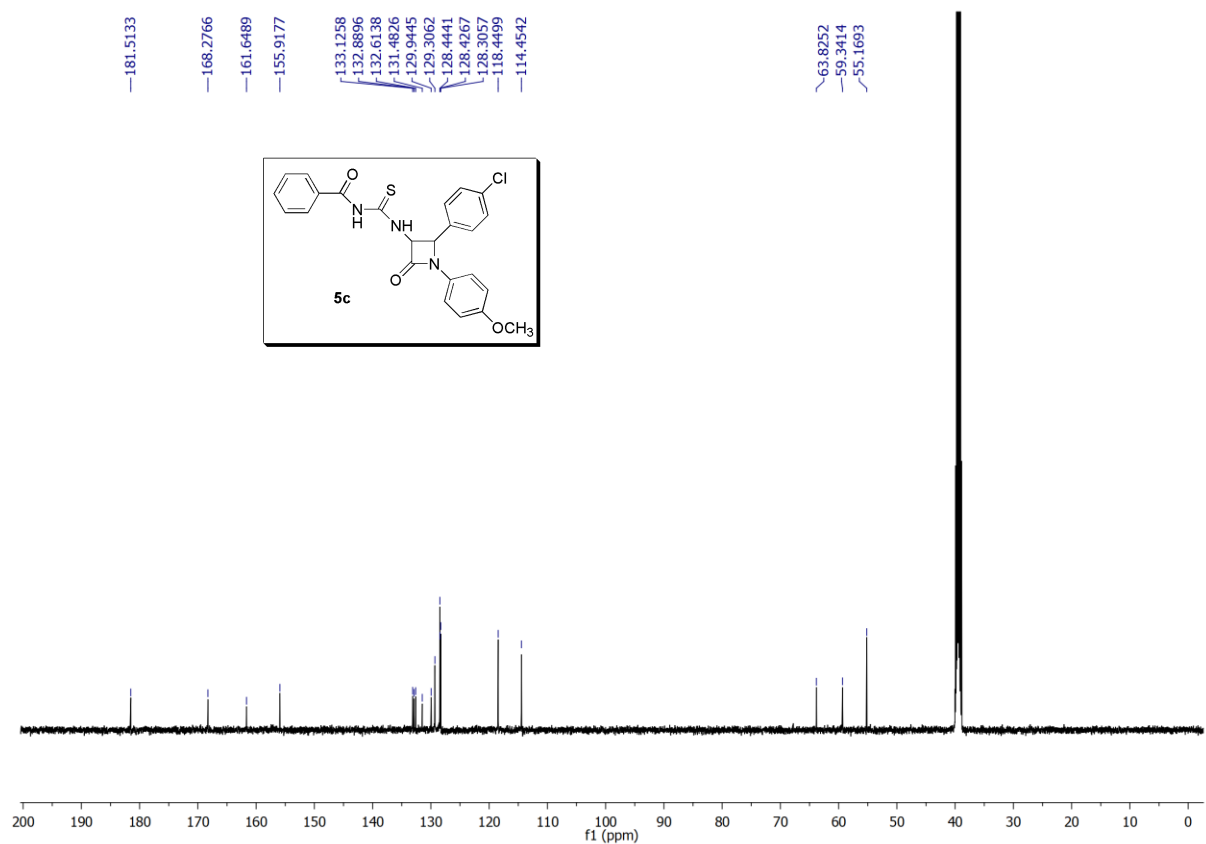

**Figure S5:** <sup>1</sup>H and <sup>13</sup>C-NMR spectra of 1-Benzoyl-3-[2-(4-chloro-phenyl)-1-(4-methoxy-phenyl)-4-oxo-azetidin-3-yl]-thiourea **5c** in DMSO

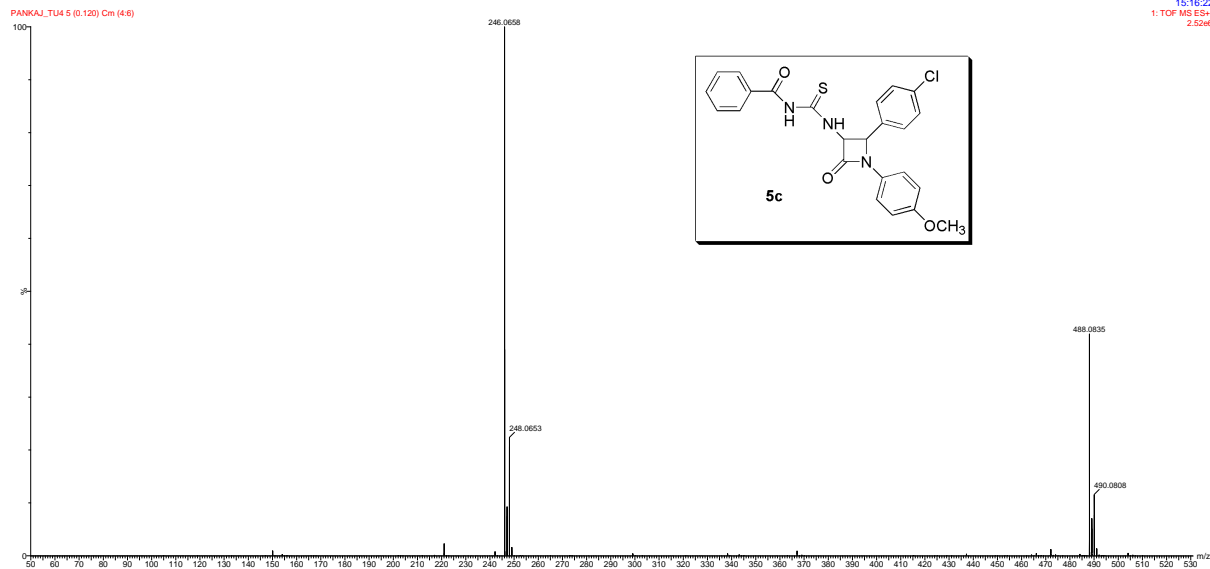

**Figure S6:** HRMS spectra of 1-Benzoyl-3-[2-(4-chloro-phenyl)-1-(4-methoxy-phenyl)-4-oxo-azetidin-3-yl]-thiourea **5c**



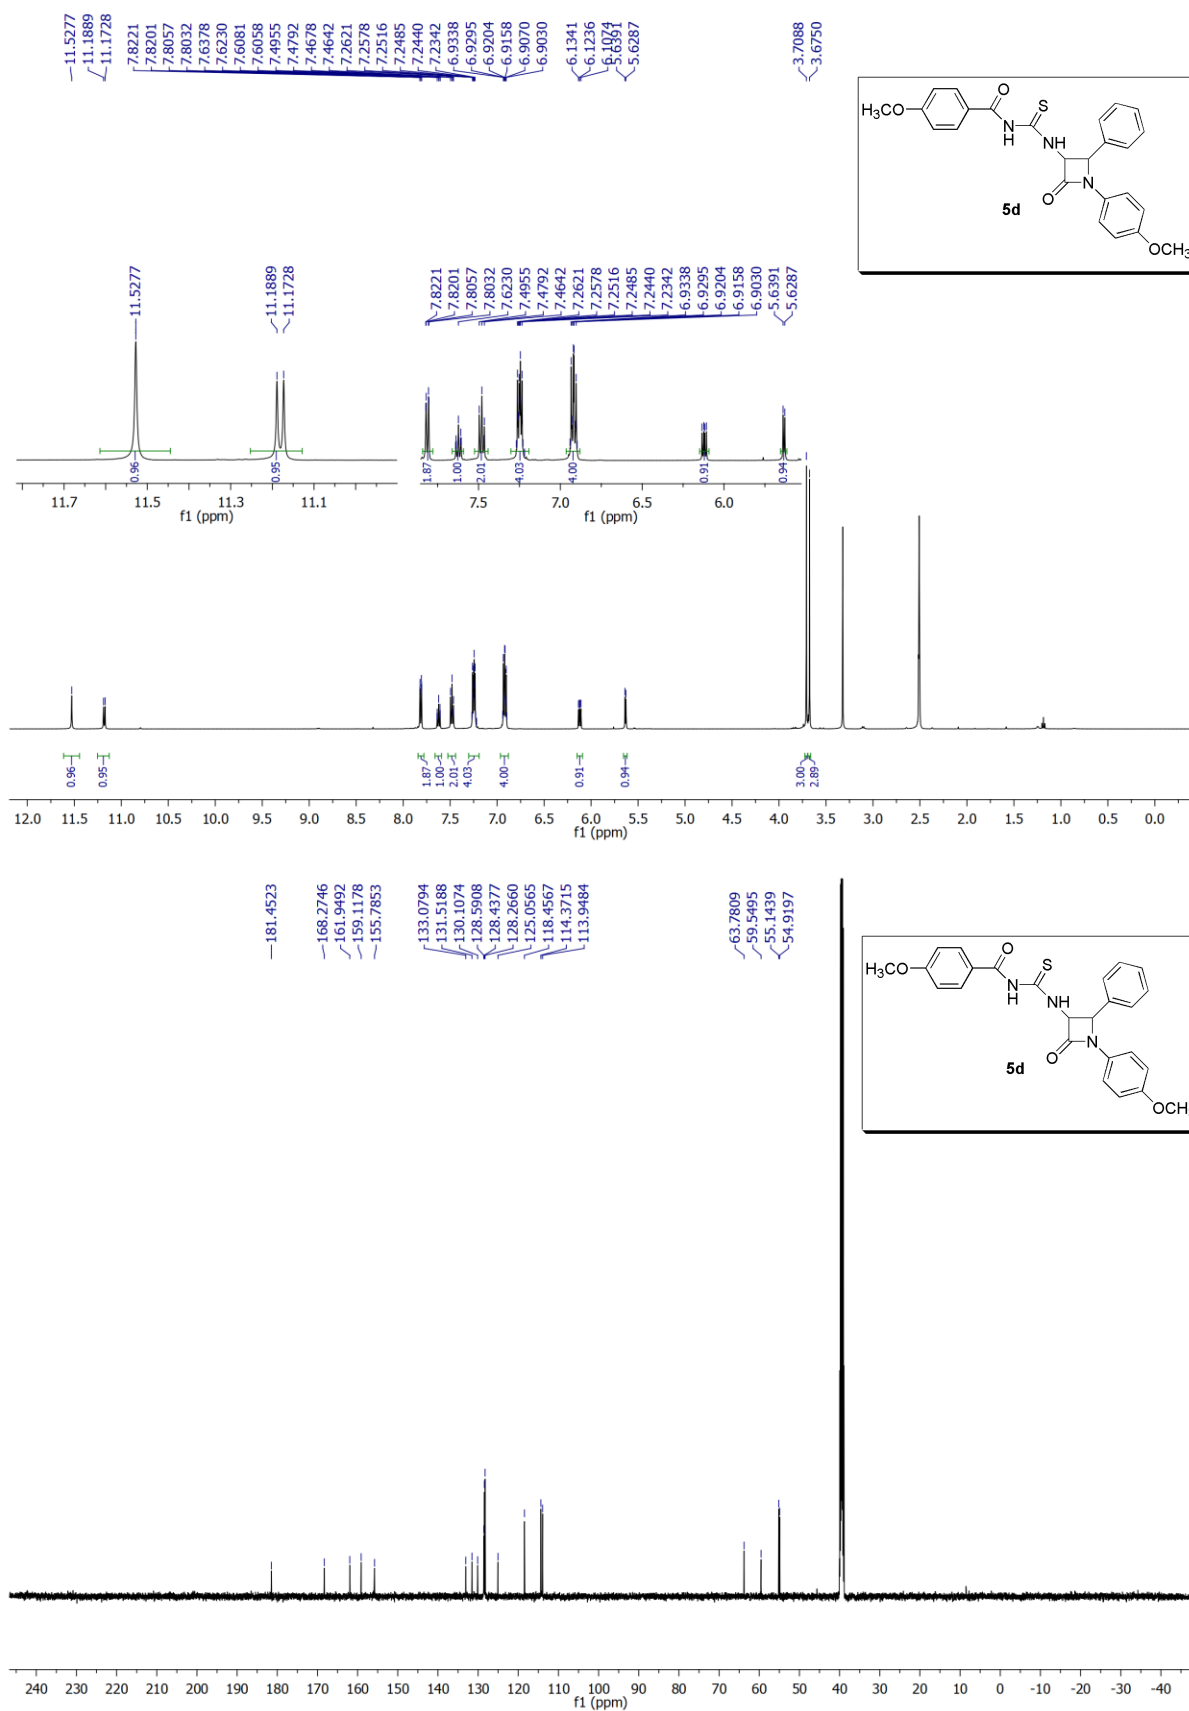

**Figure S7:** <sup>1</sup>H and <sup>13</sup>C-NMR spectra of 1-(4-Methoxy-benzoyl)-3-[1-(4-methoxy-phenyl)-2-oxo-4-phenyl-azetidin-3-yl]-thiourea **5d** in DMSO

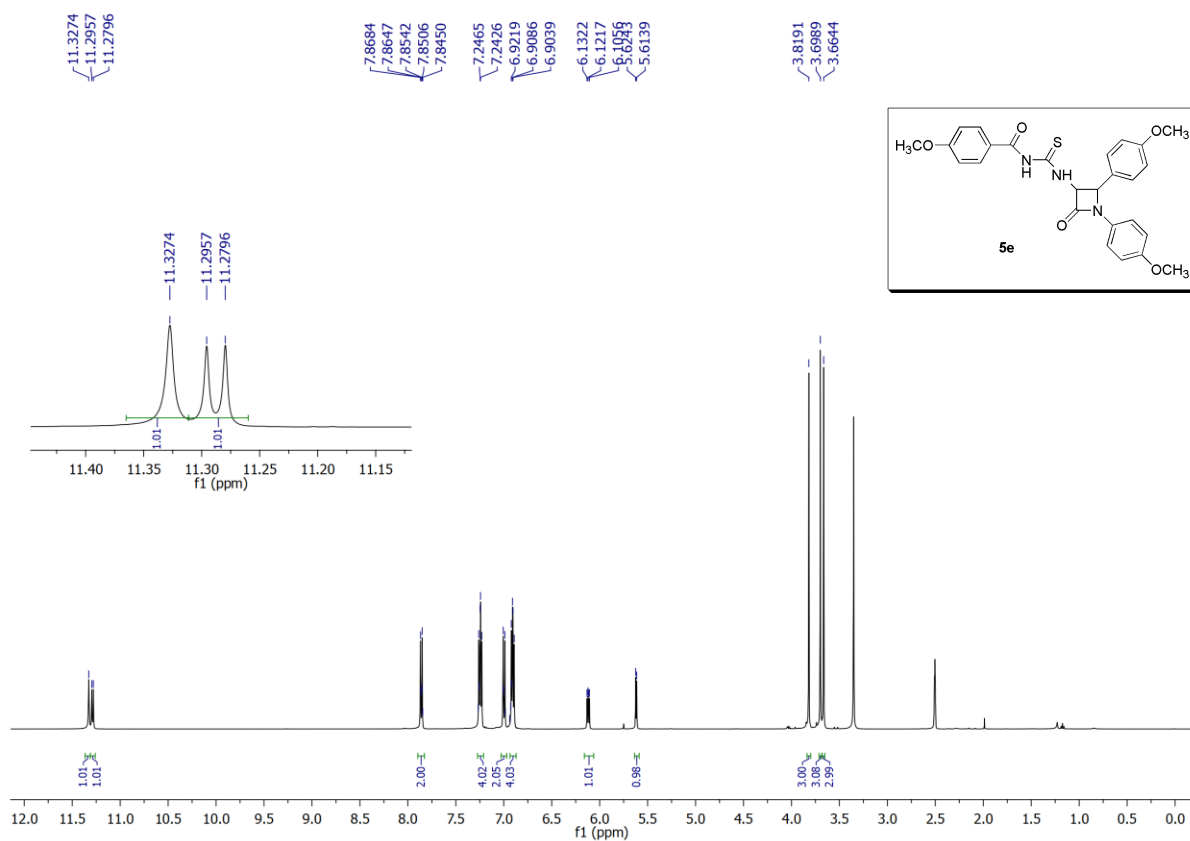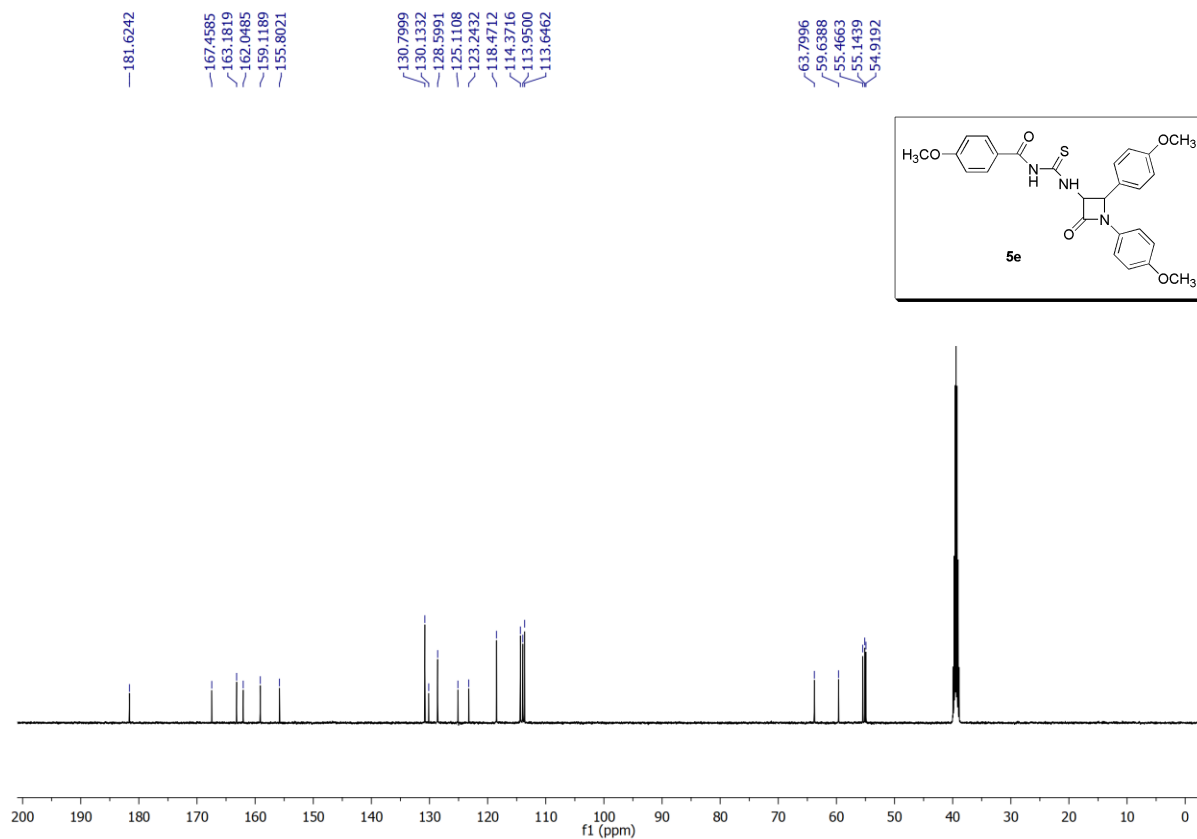

**Figure S8:** <sup>1</sup>H and <sup>13</sup>C-NMR spectra of 1-[1,2-Bis-(4-methoxy-phenyl)-4-oxo-azetidin-3-yl]-3-(4-methoxy-benzoyl)-thiourea **5e** in DMSO

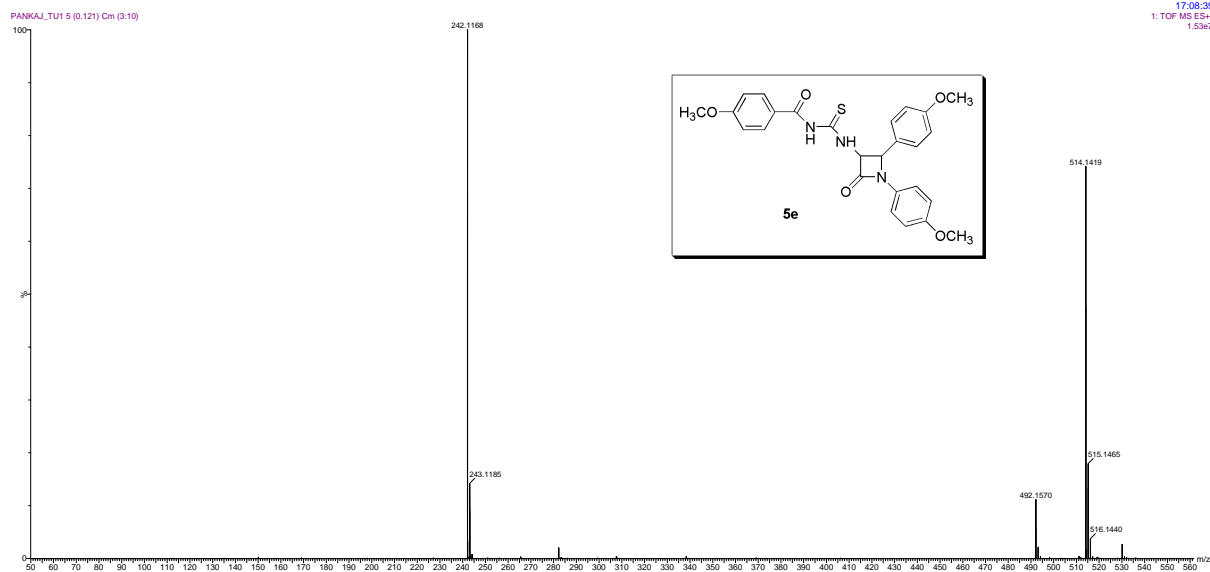

**Figure S9:** HRMS spectra of 1-[1,2-Bis-(4-methoxy-phenyl)-4-oxo-azetidin-3-yl]-3-(4-methoxy-benzoyl)-thiourea **5e**

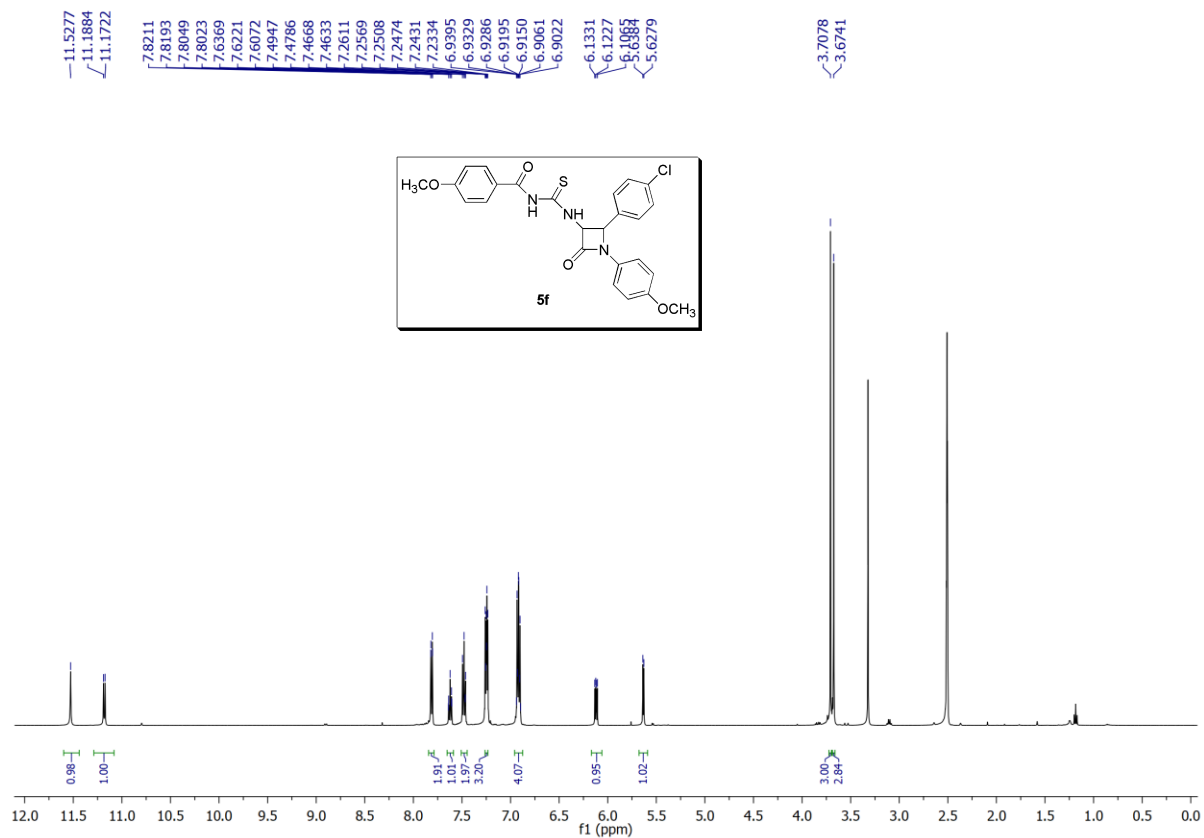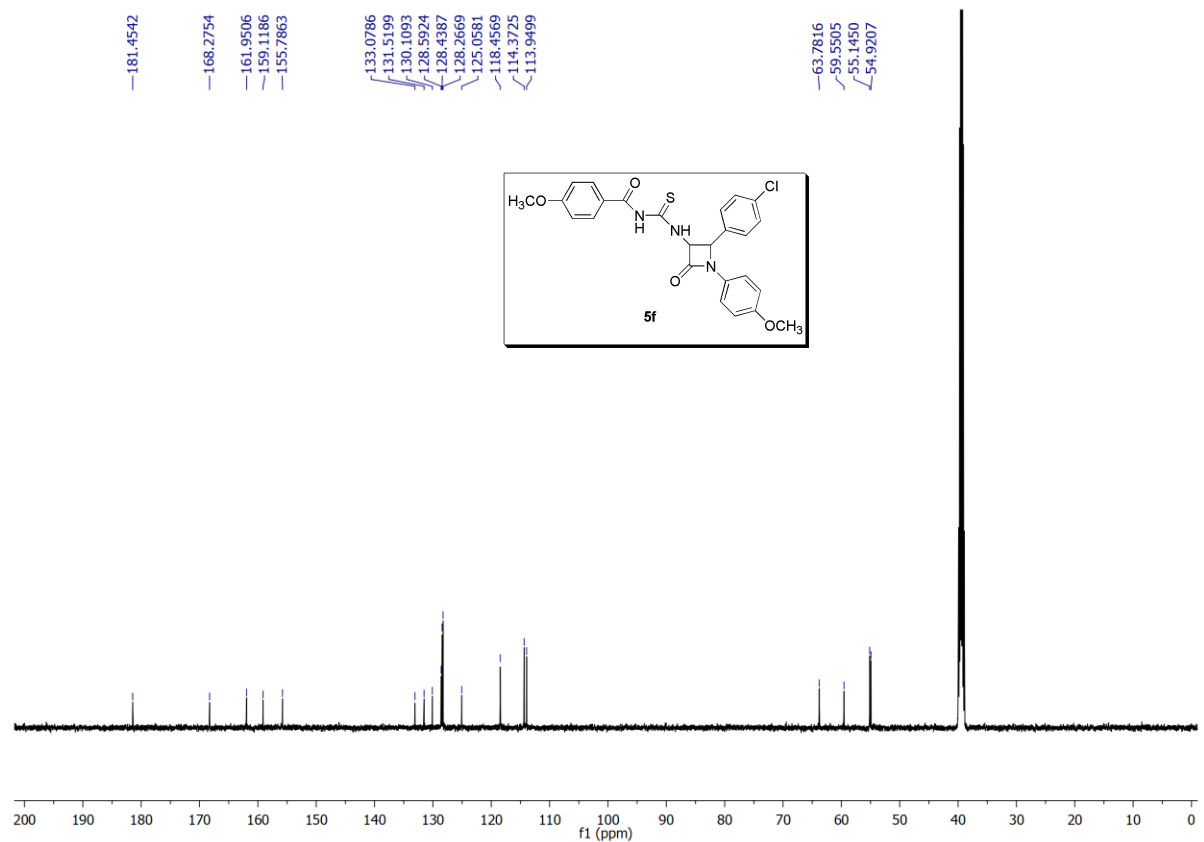

**Figure S10:** <sup>1</sup>H and <sup>13</sup>C-NMR spectra of 1-[2-(4-Chloro-phenyl)-1-(4-methoxy-phenyl)-4-oxo-azetidin-3-yl]-3-(4-methoxy-benzoyl)-thiourea **5f** in DMSO

## 2. $^1\text{H}$ , $^{13}\text{C}$ -NMR and HRMS spectra of 3-aryollurea- $\beta$ -lactams **8a-f**

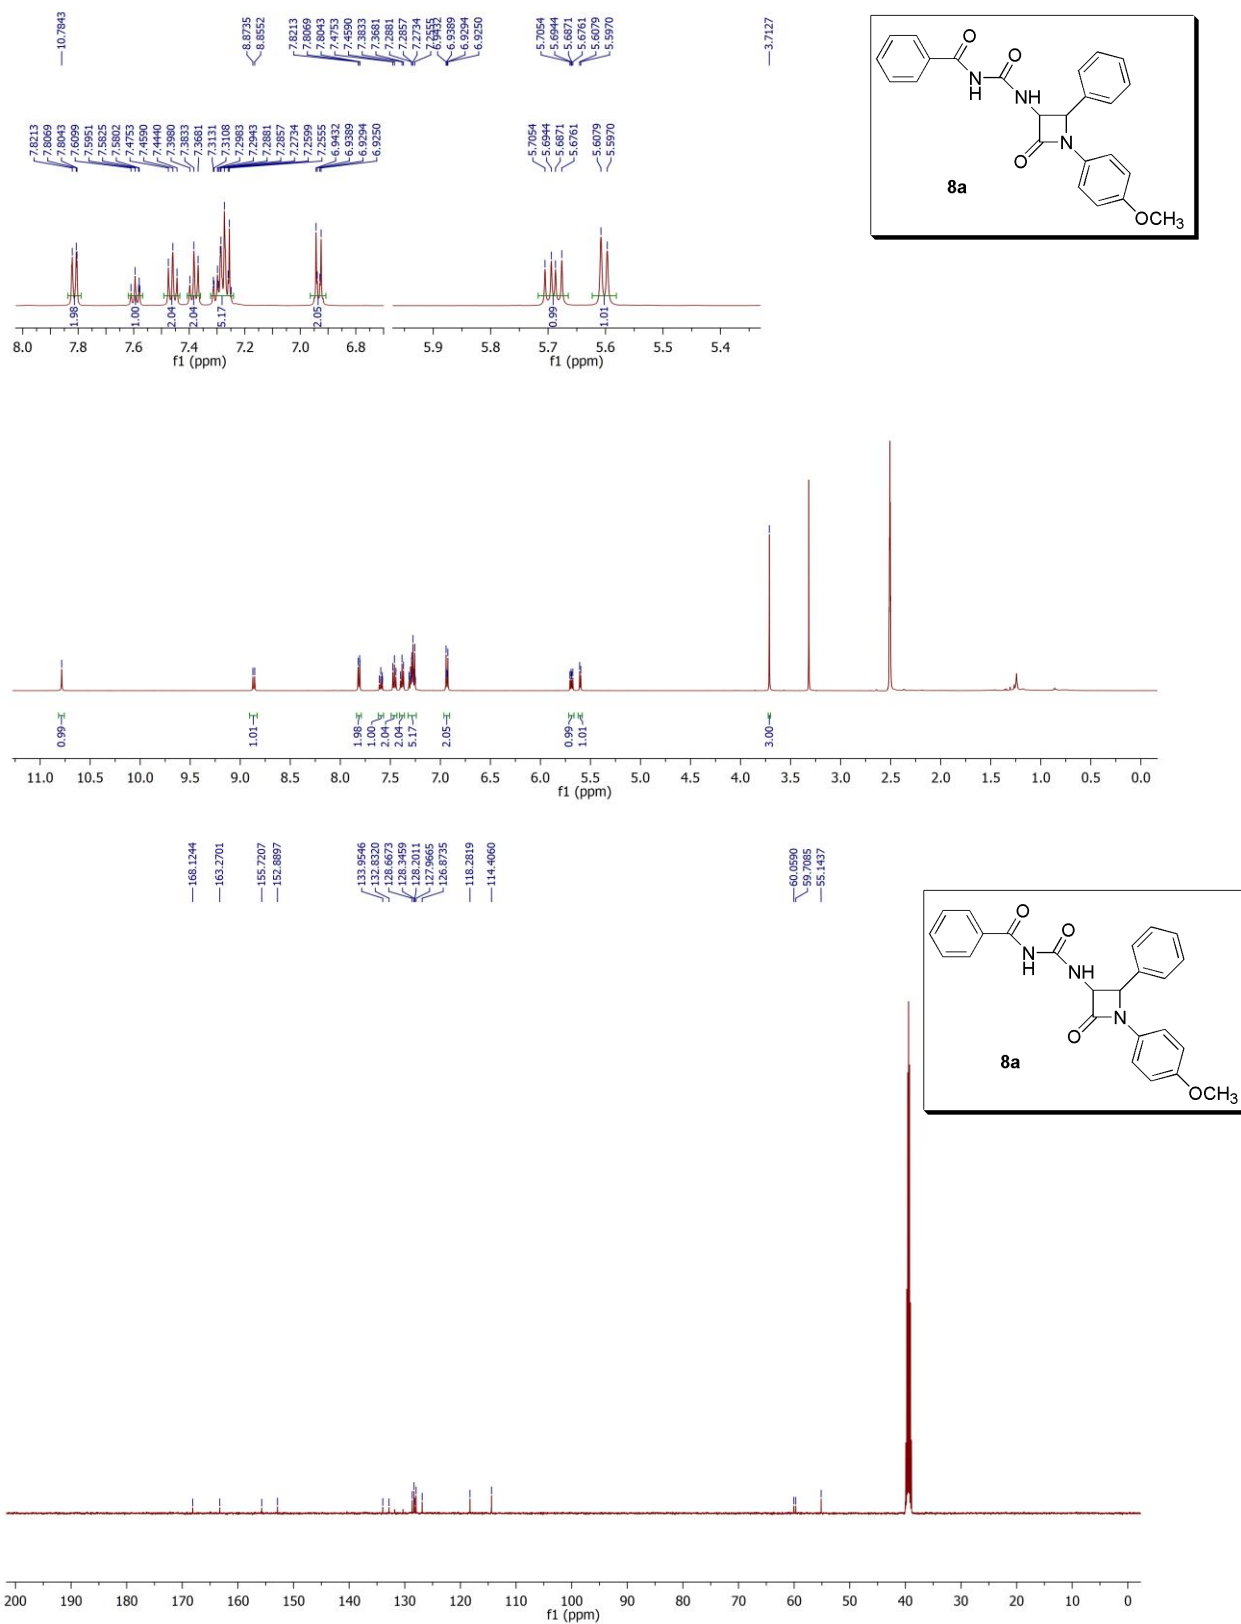

**Figure S11:**  $^1\text{H}$  and  $^{13}\text{C}$ -NMR spectra of 1-Benzoyl-3-[1-(4-methoxy-phenyl)-2-oxo-4-phenyl-azetidin-3-yl]-urea **8a** in DMSO

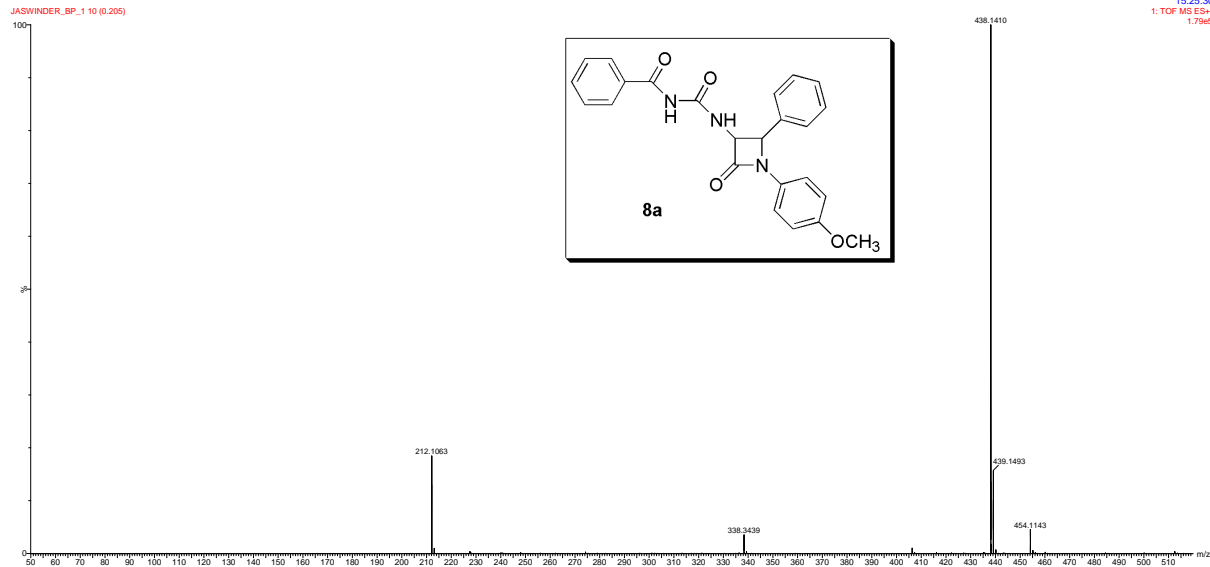

**Figure S12:** HRMS spectra of 1-Benzoyl-3-[1-(4-methoxy-phenyl)-2-oxo-4-phenyl-azetidin-3-yl]-urea **8a**

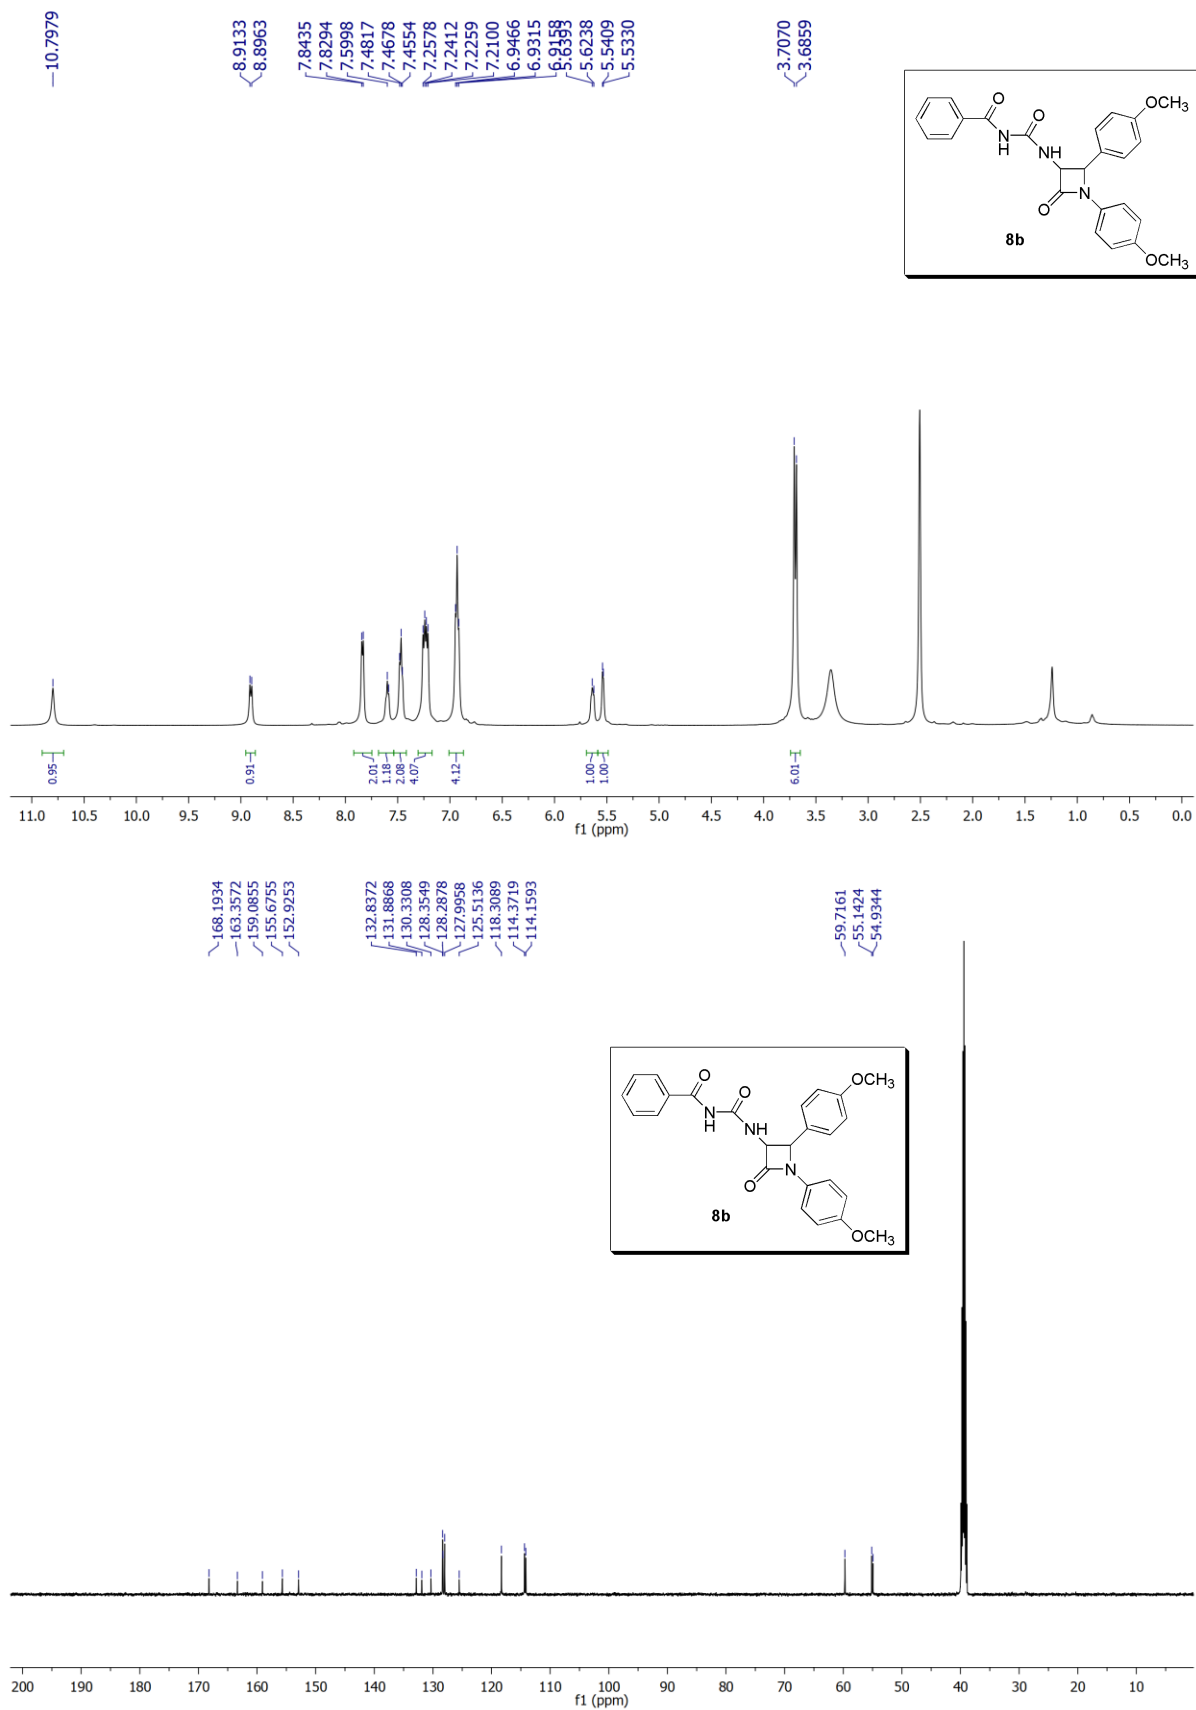

**Figure S13:** <sup>1</sup>H and <sup>13</sup>C-NMR spectra of 1-Benzoyl-3-[1,2-bis-(4-methoxy-phenyl)-4-oxo-azetidin-3-yl]-urea **8b** in DMSO

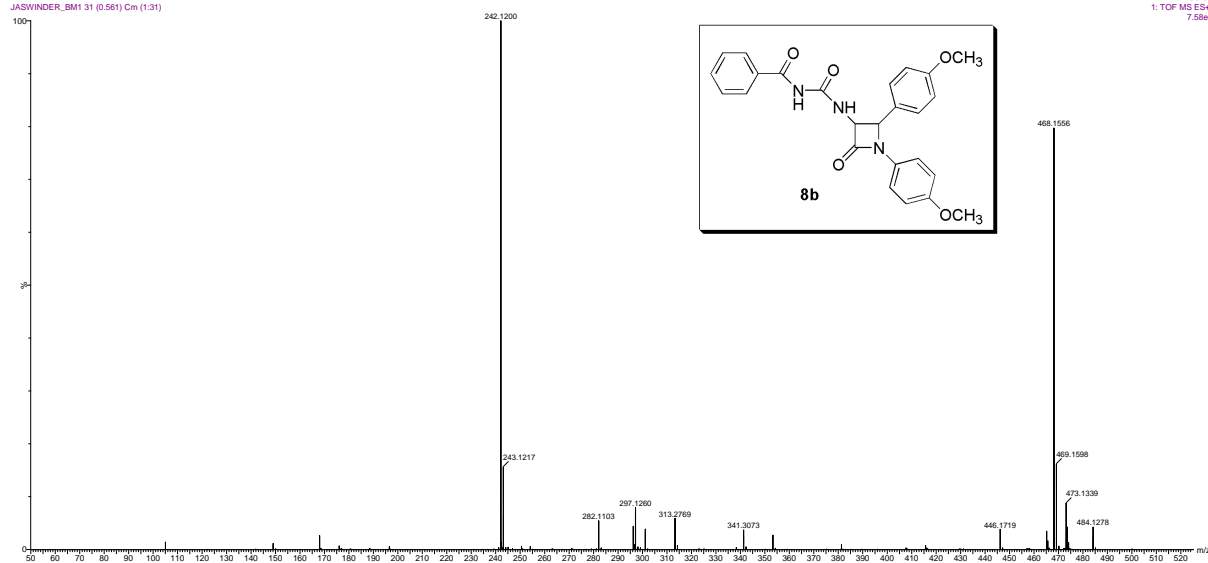

**Figure S14:** HRMS spectra of 1-Benzoyl-3-[1,2-bis-(4-methoxy-phenyl)-4-oxo-azetidin-3-yl]-urea **8b**



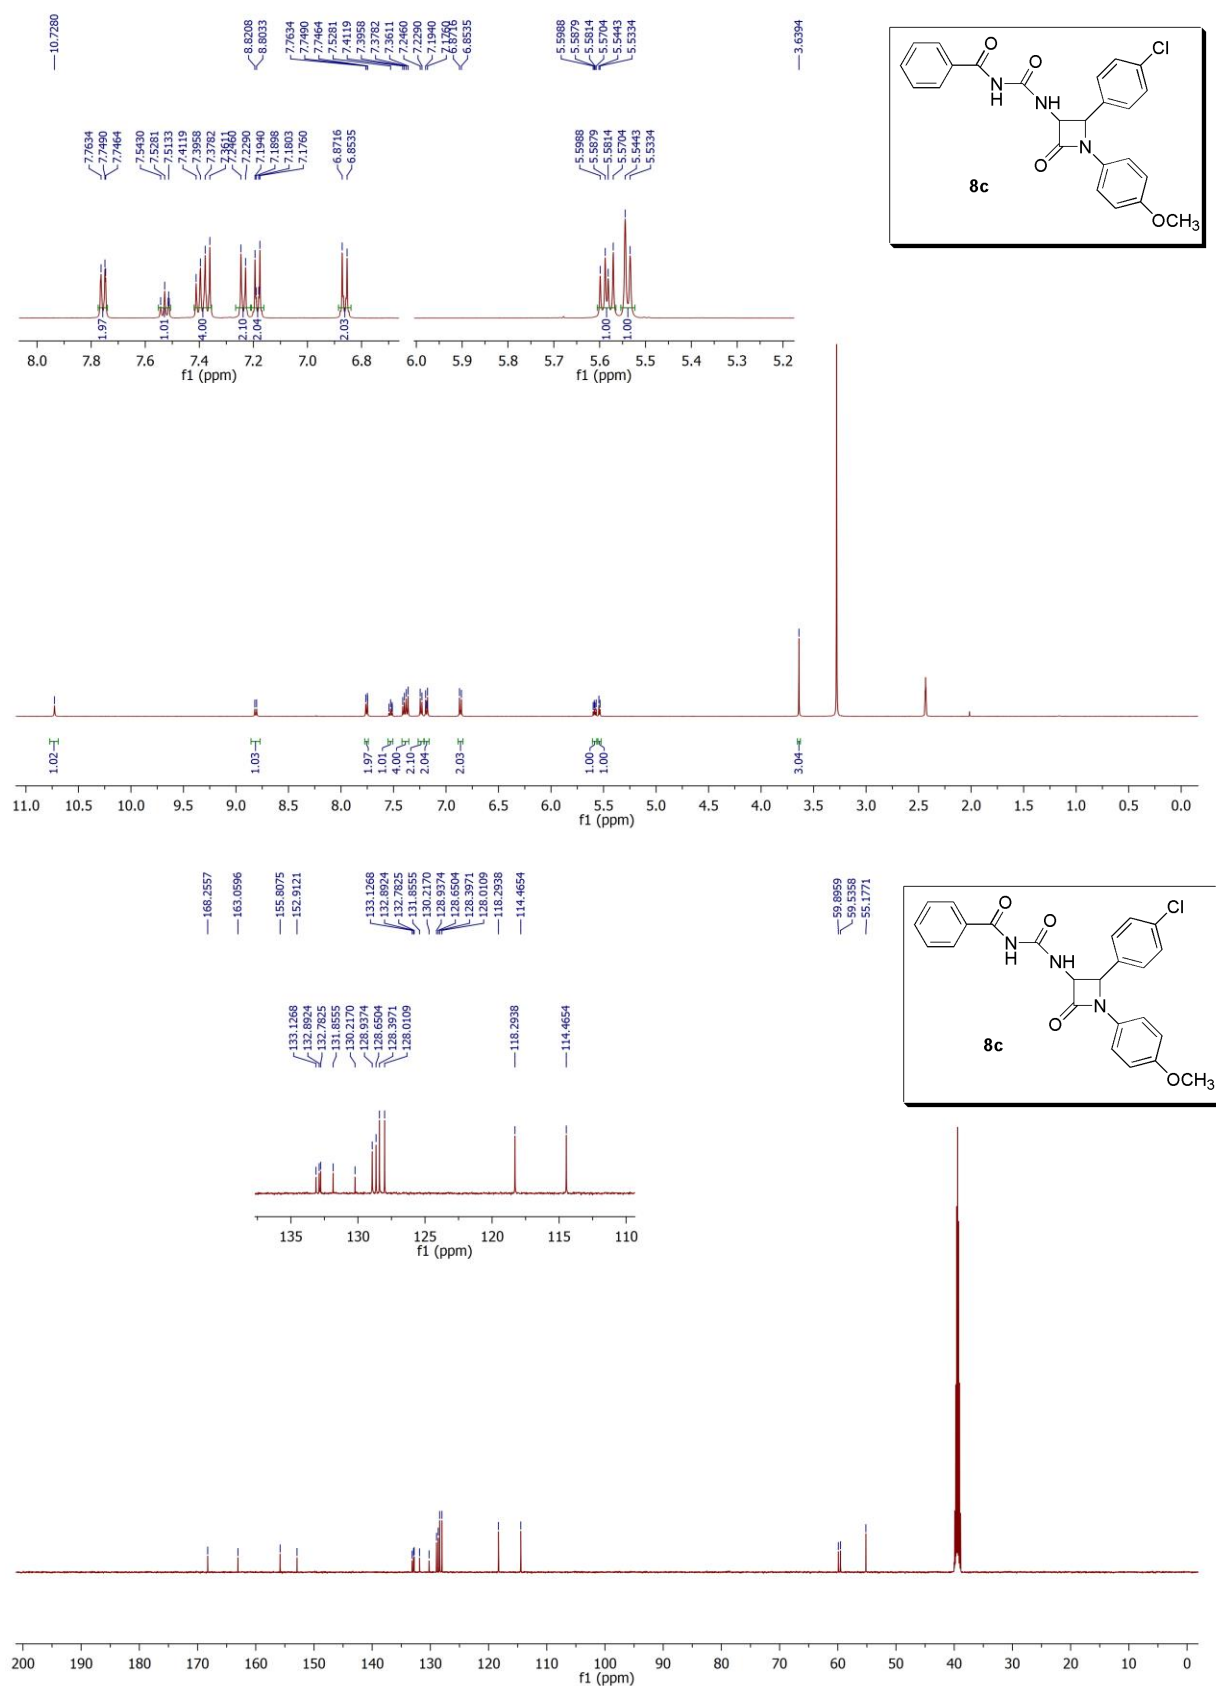

**Figure S15:** <sup>1</sup>H and <sup>13</sup>C-NMR spectra of 1-Benzoyl-3-[2-(4-chloro-phenyl)-1-(4-methoxy-phenyl)-4-oxo-azetidin-3-yl]-urea **8c** in DMSO

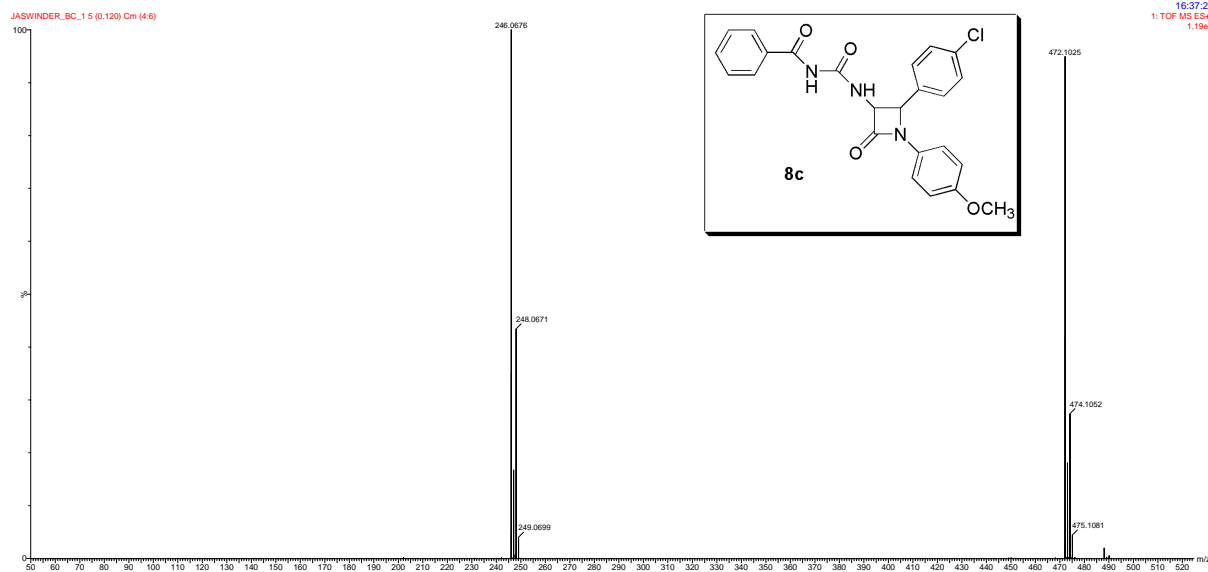

**Figure S16:** HRMS spectra of 1-Benzoyl-3-[2-(4-chloro-phenyl)-1-(4-methoxy-phenyl)-4-oxo-azetidin-3-yl]-urea **8c**

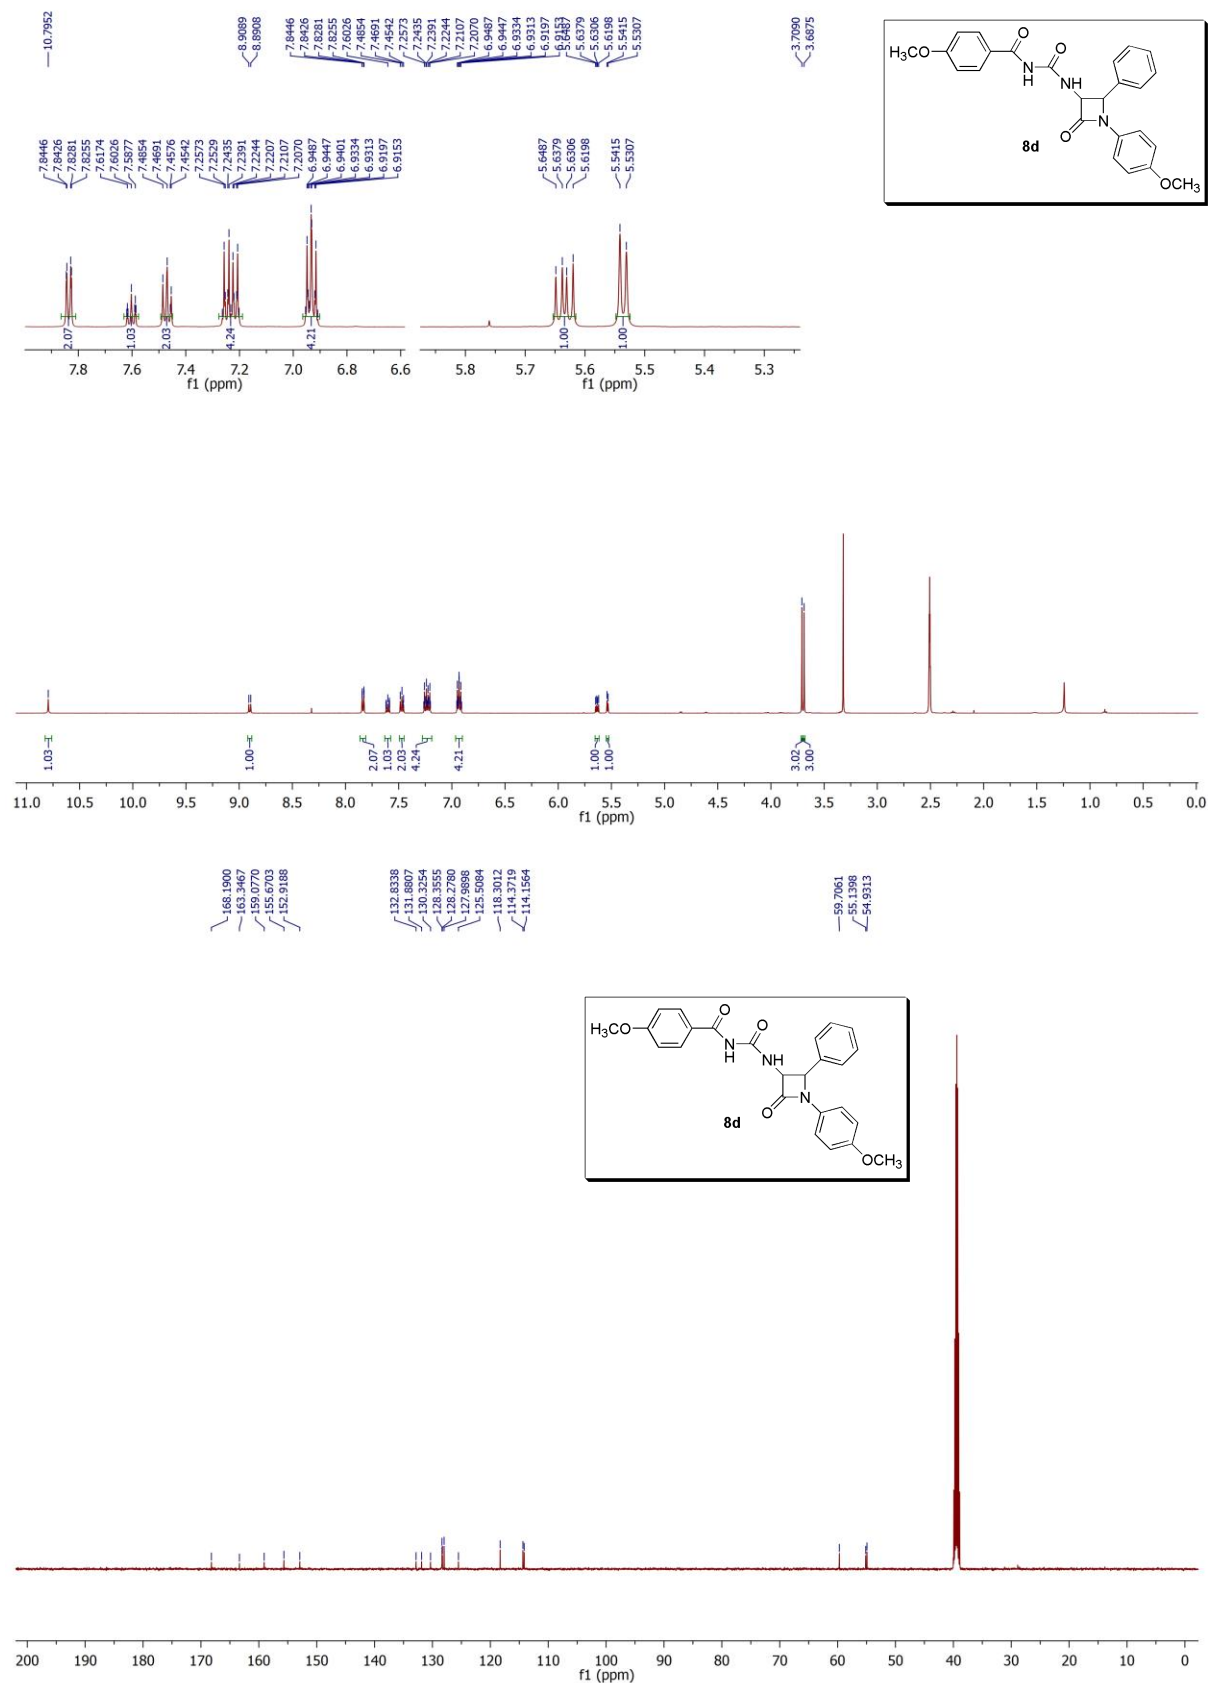

**Figure S17:** <sup>1</sup>H and <sup>13</sup>C-NMR spectra of 1-(4-Methoxy-benzoyl)-3-[1-(4-methoxy-phenyl)-2-oxo-4-phenyl-azetidin-3-yl]-urea **8d** in DMSO

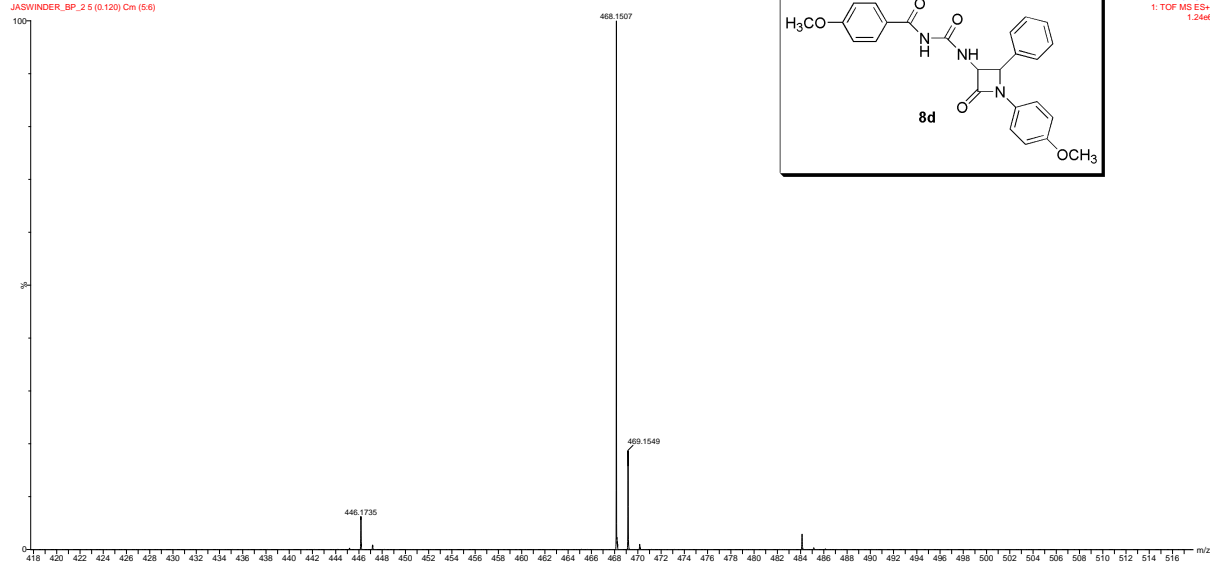

**Figure S18:** HRMS spectra of 1-(4-Methoxy-benzoyl)-3-[1-(4-methoxy-phenyl)-2-oxo-4-phenyl-azetidin-3-yl]-urea **8d**

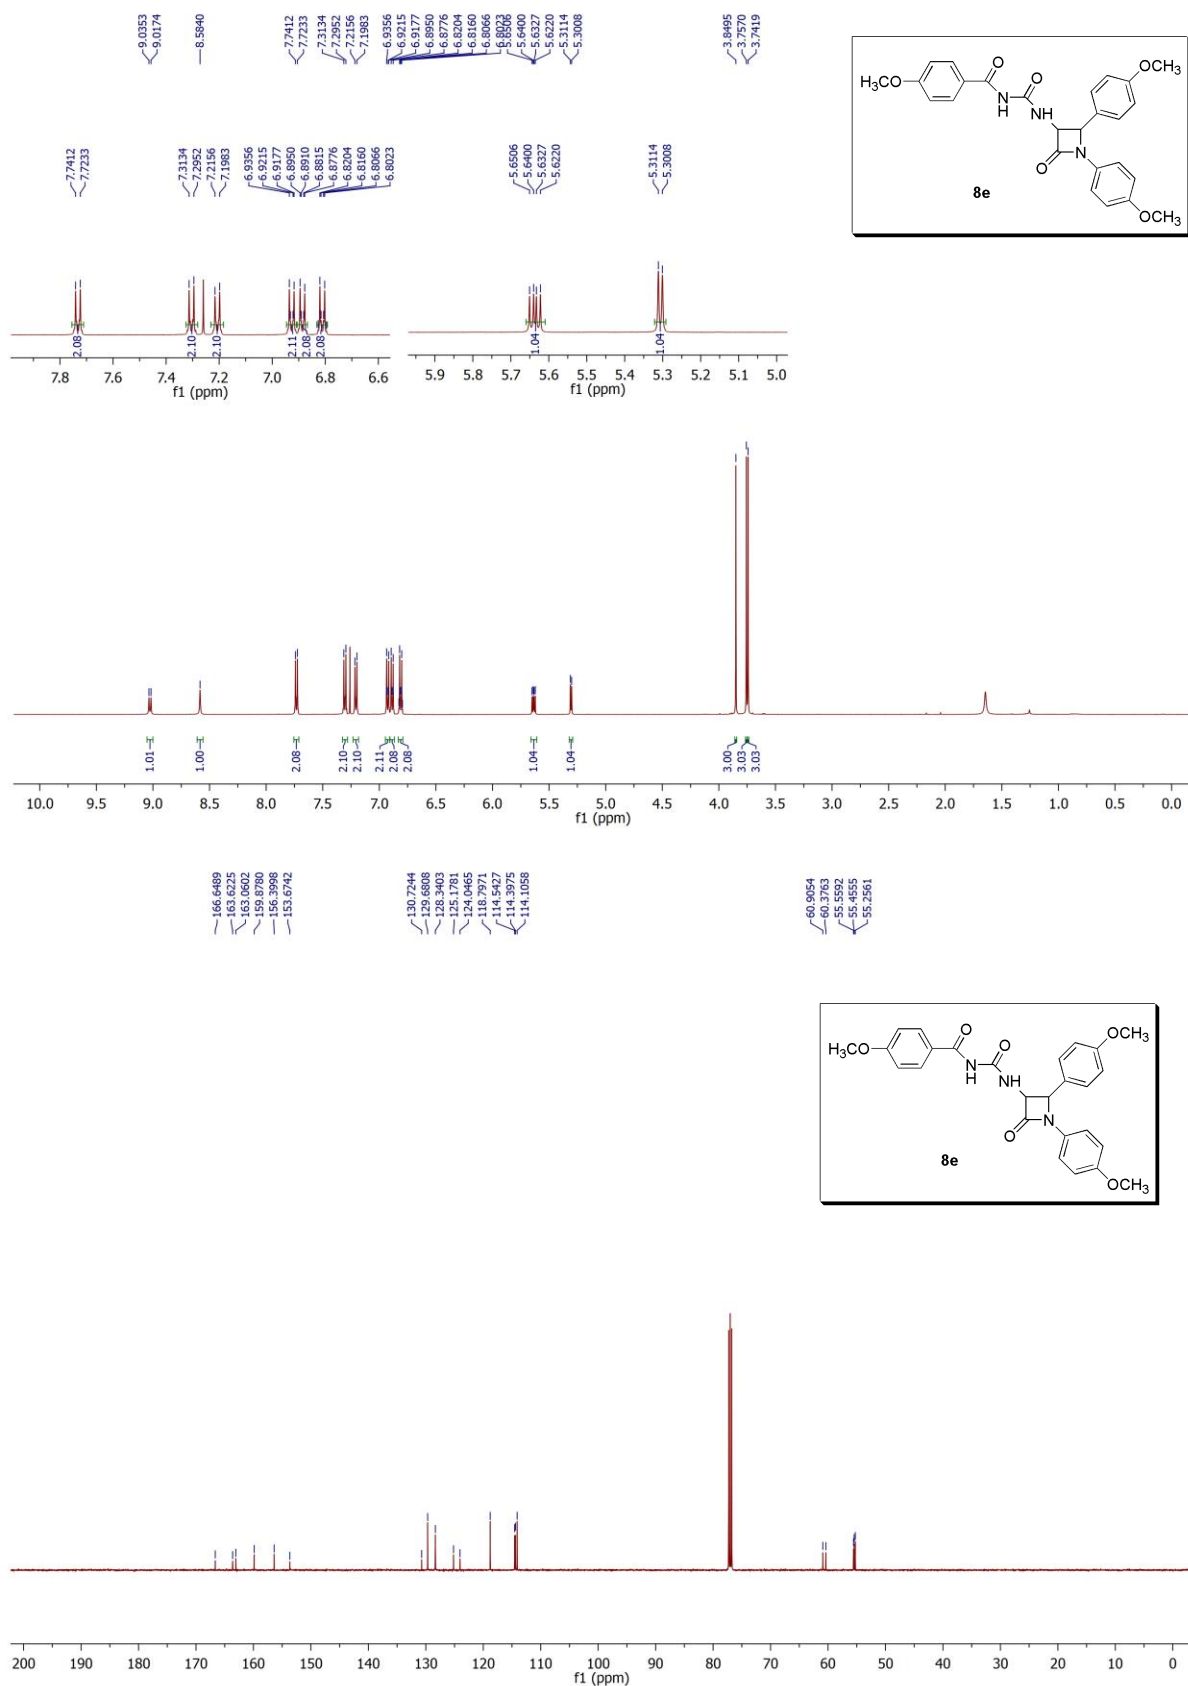

**Figure S19:** <sup>1</sup>H and <sup>13</sup>C-NMR spectra of 1-[1,2-Bis-(4-methoxy-phenyl)-4-oxo-azetidin-3-yl]-3-(4-methoxy-benzoyl)-urea **8e** in CDCl<sub>3</sub>

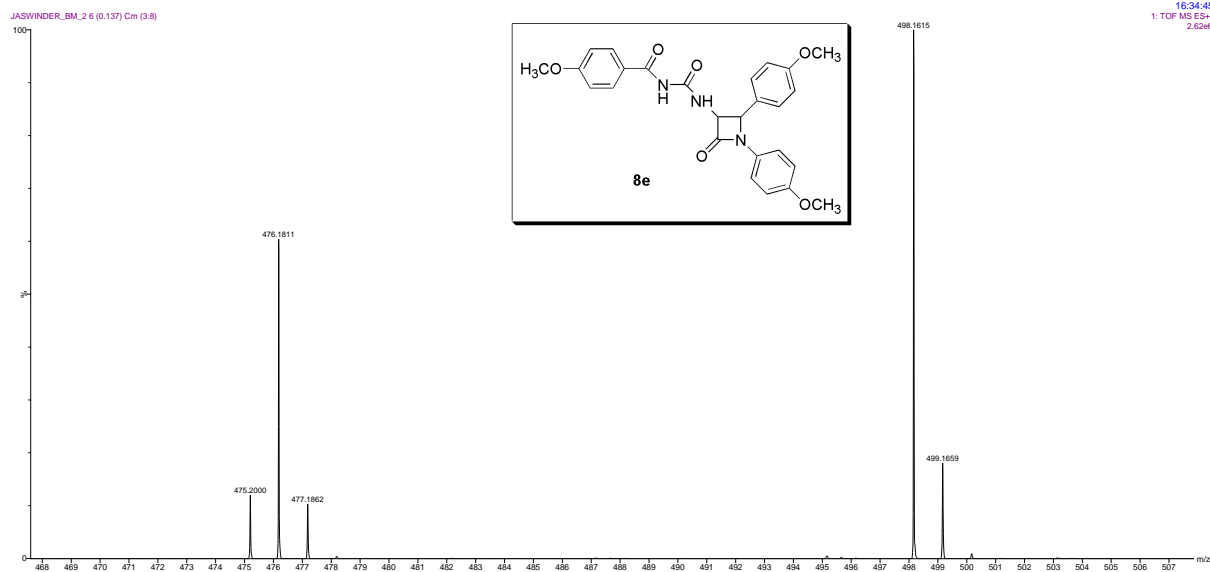

**Figure S20:** HRMS spectra of 1-[1,2-Bis-(4-methoxy-phenyl)-4-oxo-azetidin-3-yl]-3-(4-methoxy-benzoyl)-urea **8e**

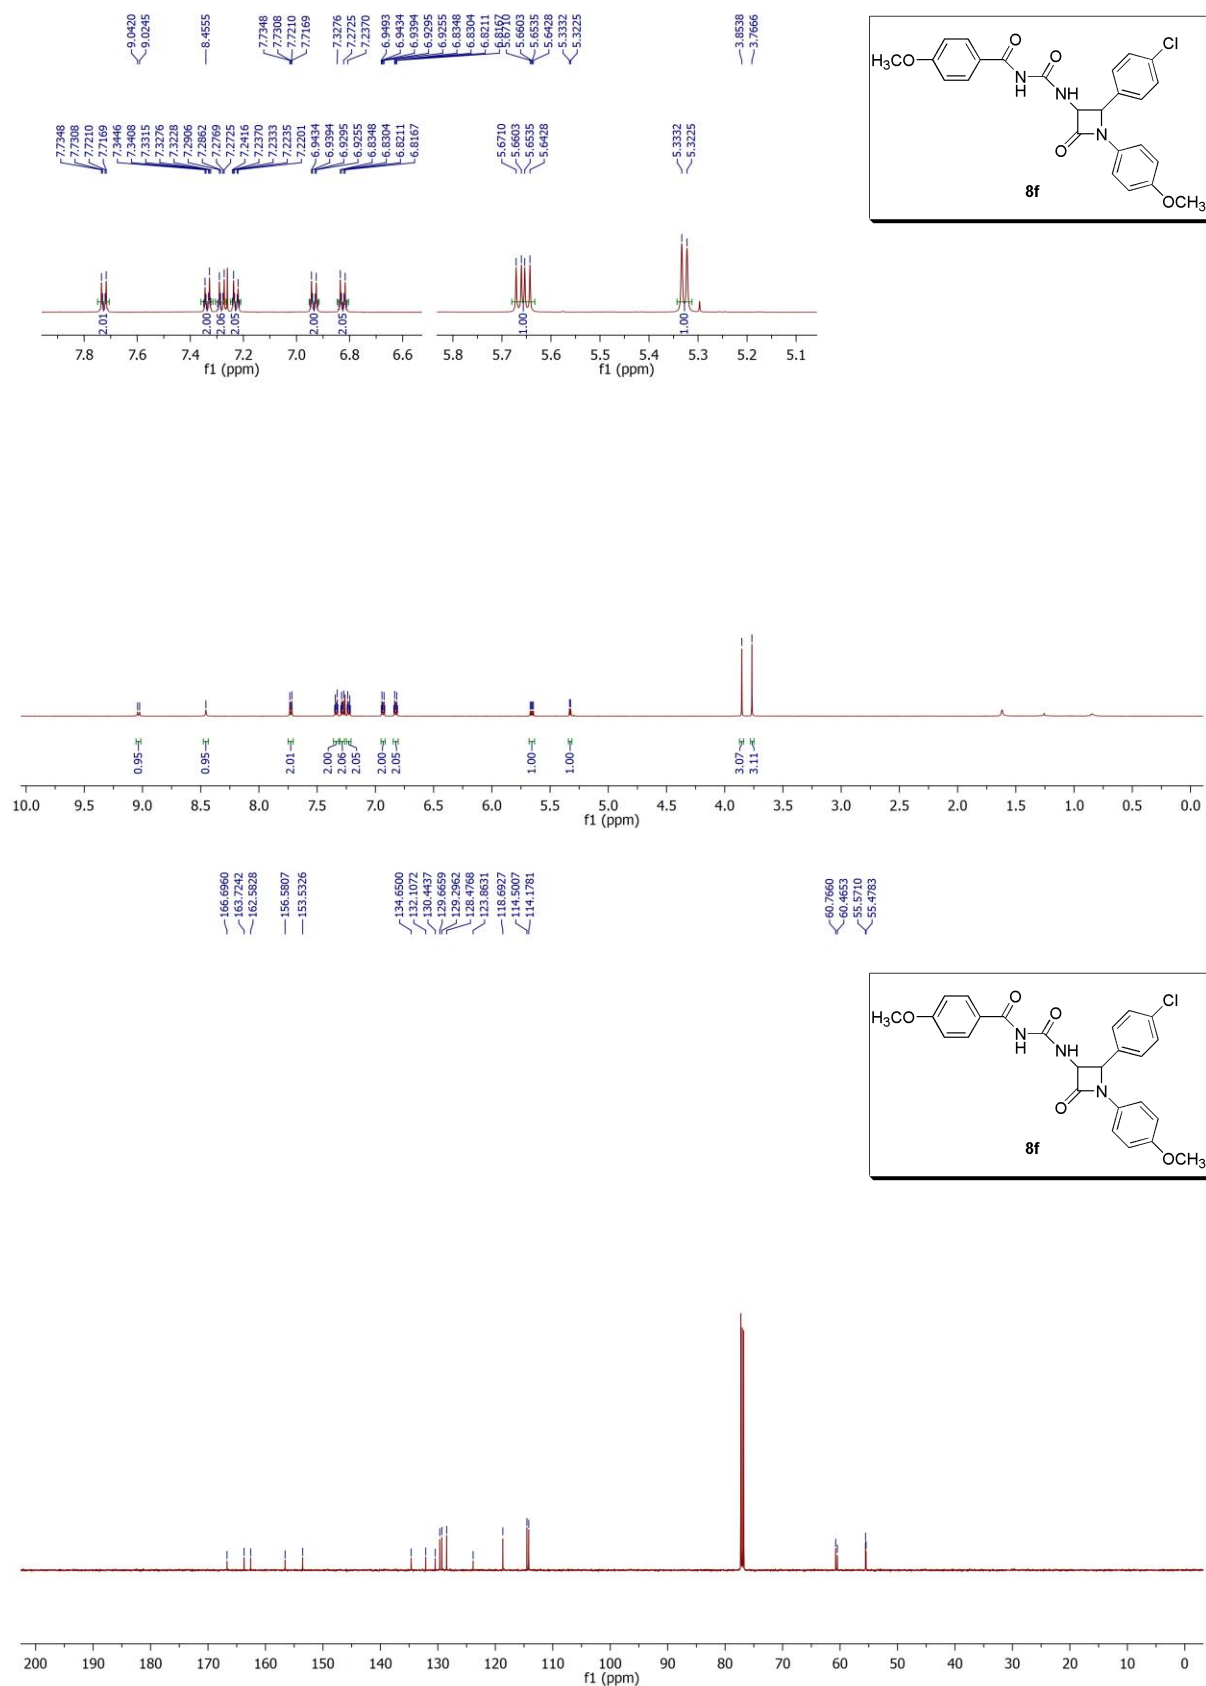

**Figure S21:** <sup>1</sup>H and <sup>13</sup>C-NMR spectra of 1-[2-(4-Chloro-phenyl)-1-(4-methoxy-phenyl)-4-oxo-azetidin-3-yl]-3-(4-methoxy-benzoyl)-urea **8f** in CDCl<sub>3</sub>

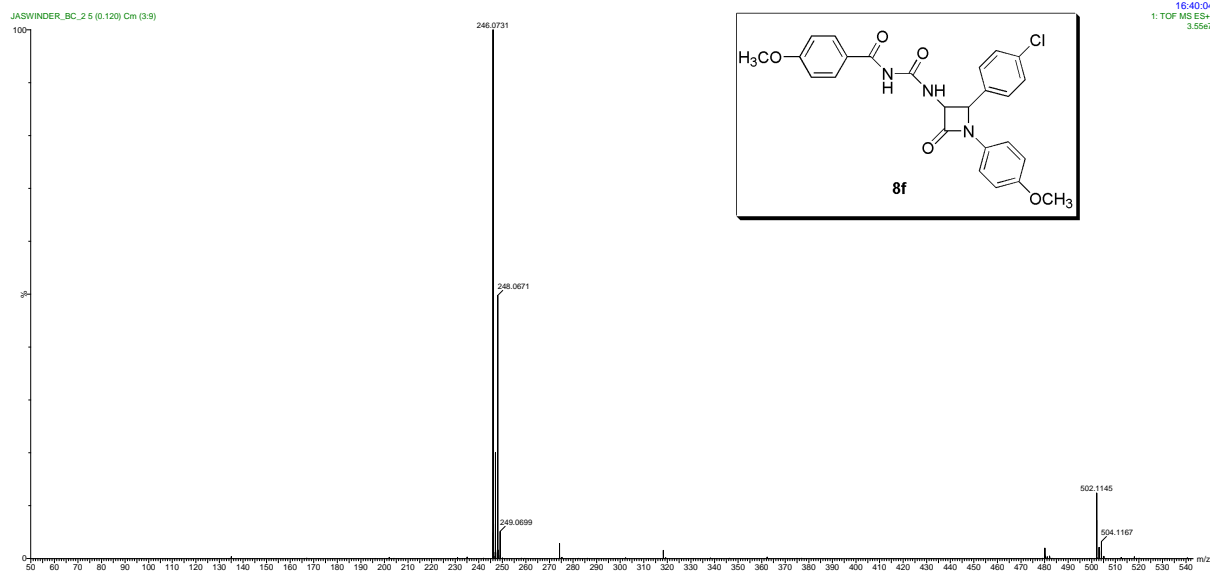

**Figure S22:** HRMS spectra of 1-[2-(4-Chloro-phenyl)-1-(4-methoxy-phenyl)-4-oxo-azetidin-3-yl]-3-(4-methoxy-benzoyl)-urea **8f**



### 3. $^1\text{H}$ and $^{13}\text{C}$ -NMR spectra of thiourea derivatives 10a-c

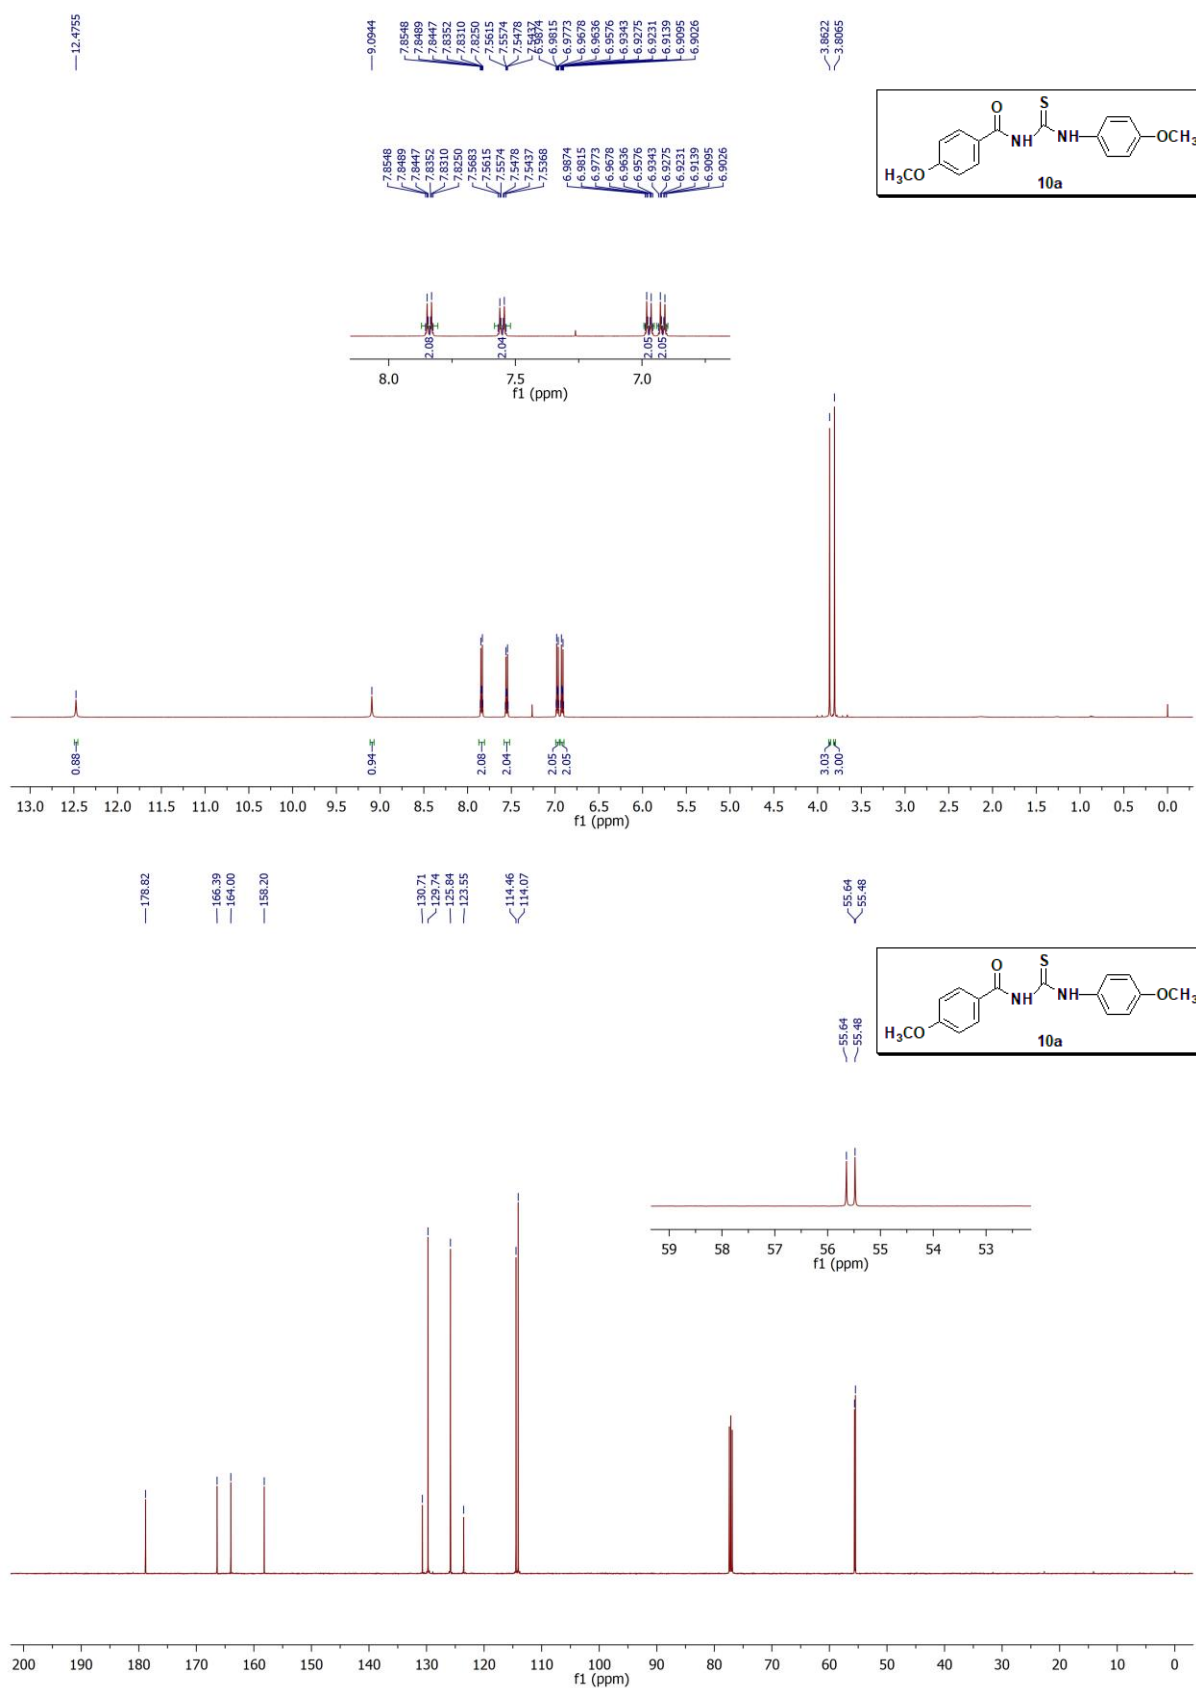

**Figure S23:**  $^1\text{H}$  and  $^{13}\text{C}$ -NMR spectra of 1-(4-methoxy-benzoyl)-3-(4-methoxy-phenyl)-thiourea **10a** in  $\text{CDCl}_3$

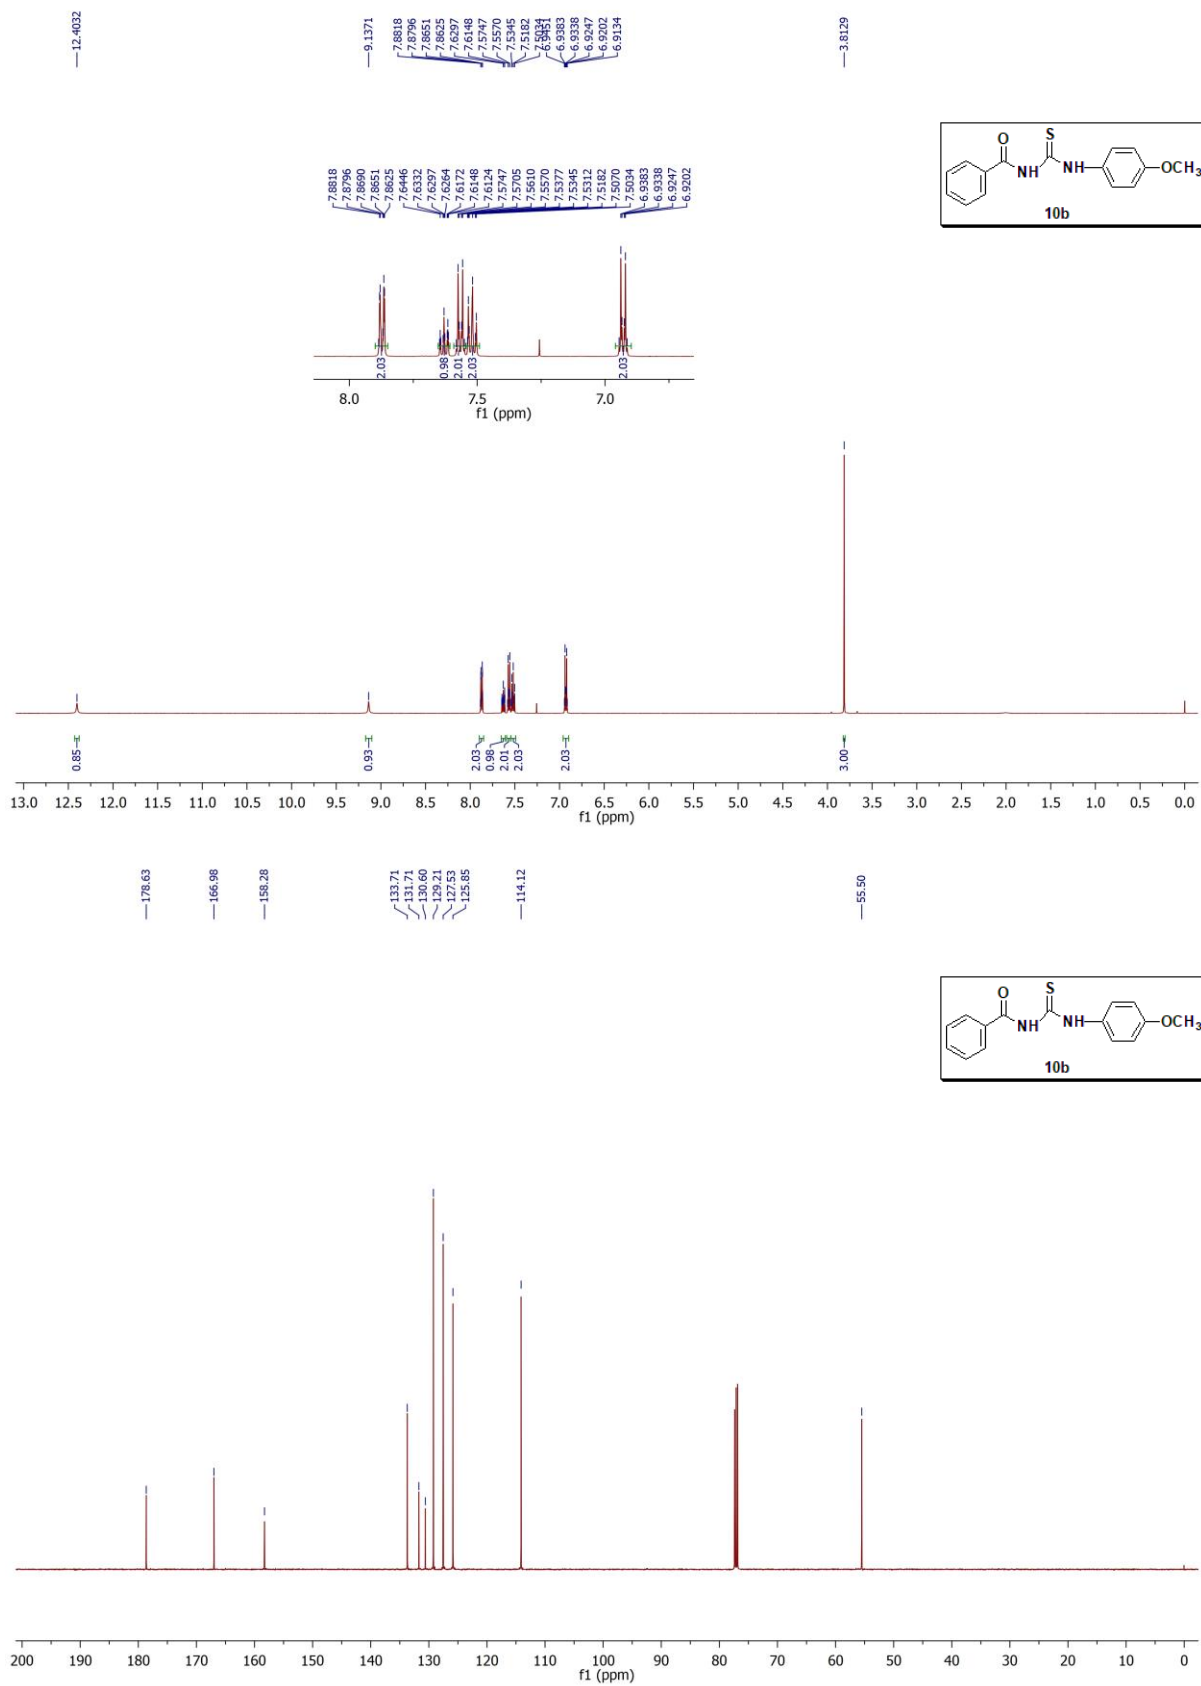

**Figure S24:** <sup>1</sup>H and <sup>13</sup>C-NMR spectra of 1-Benzoyl-3-(4-methoxy-phenyl)-thiourea **10b** in CDCl<sub>3</sub>

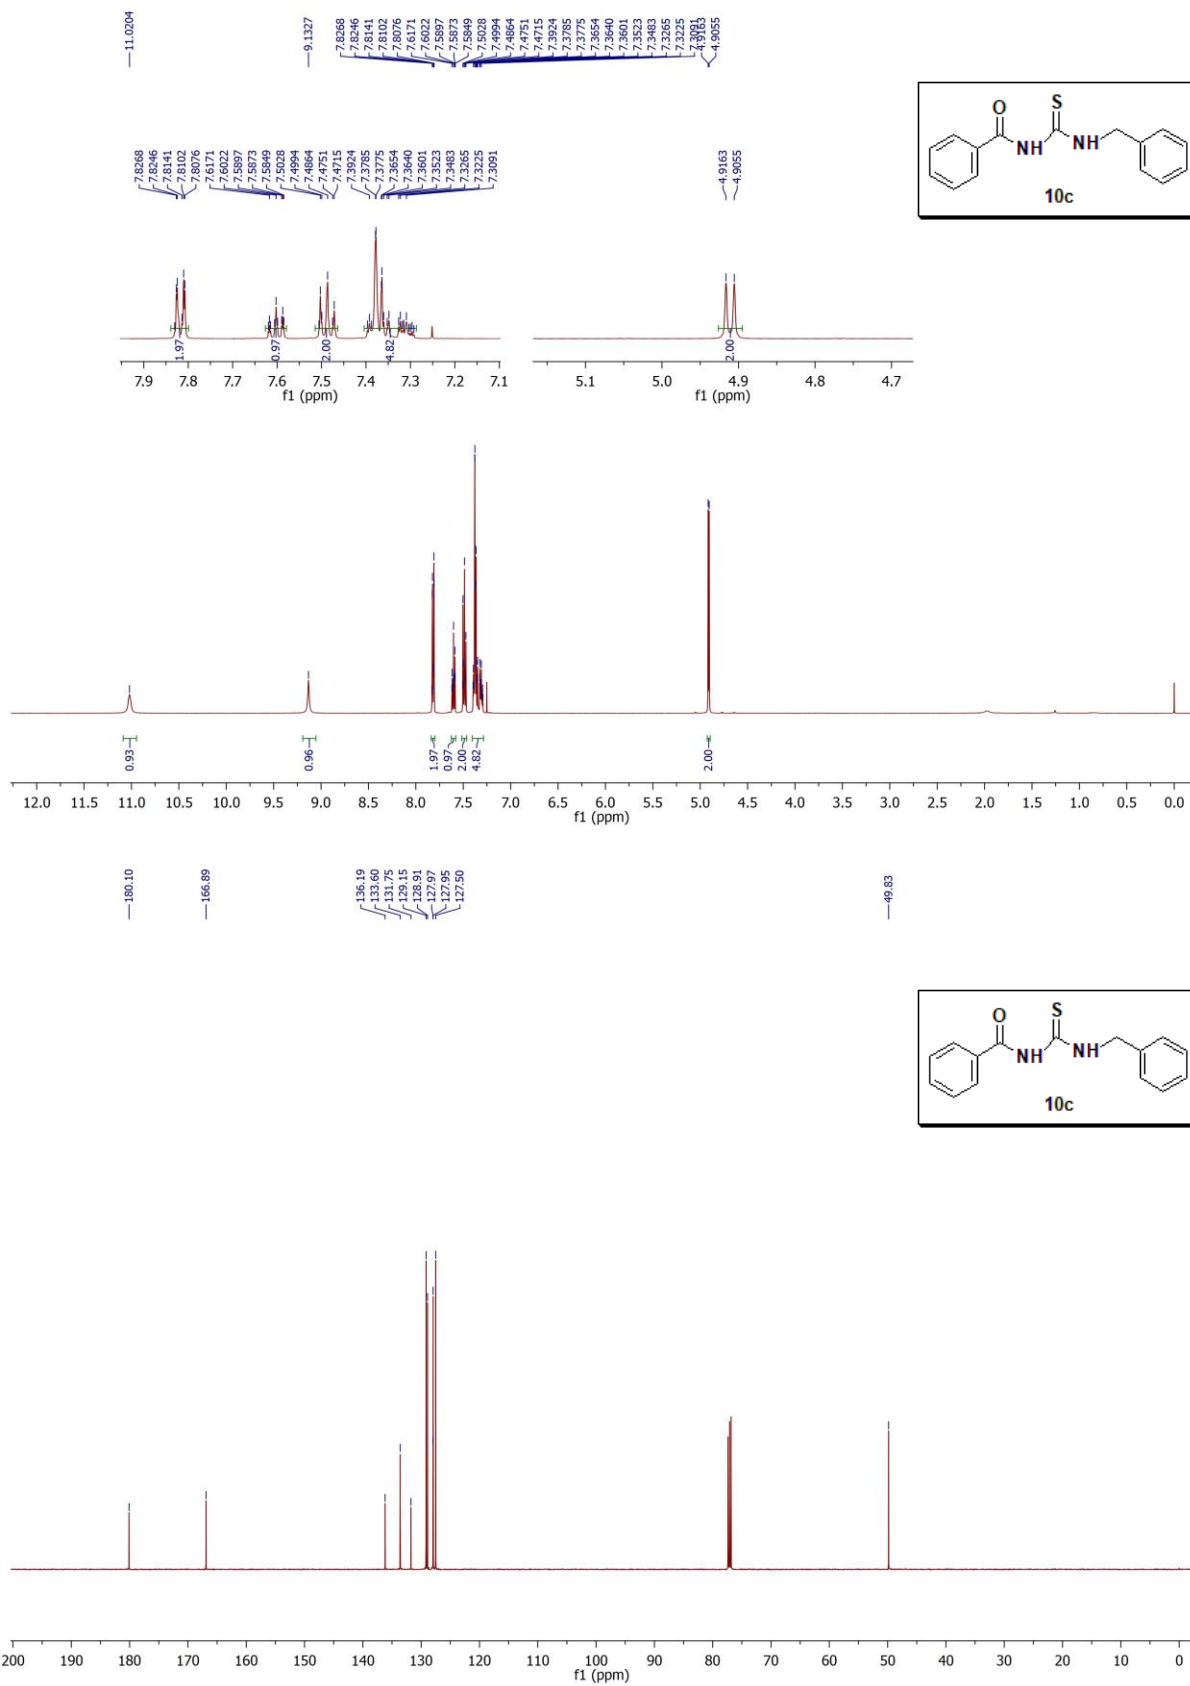

**Figure S25:** <sup>1</sup>H and <sup>13</sup>C-NMR spectra of 1-Benzoyl-3-benzyl-thiourea **10c** in CDCl<sub>3</sub>

#### 4. $^1\text{H}$ and $^{13}\text{C}$ -NMR spectra of amide derivatives 11a-c

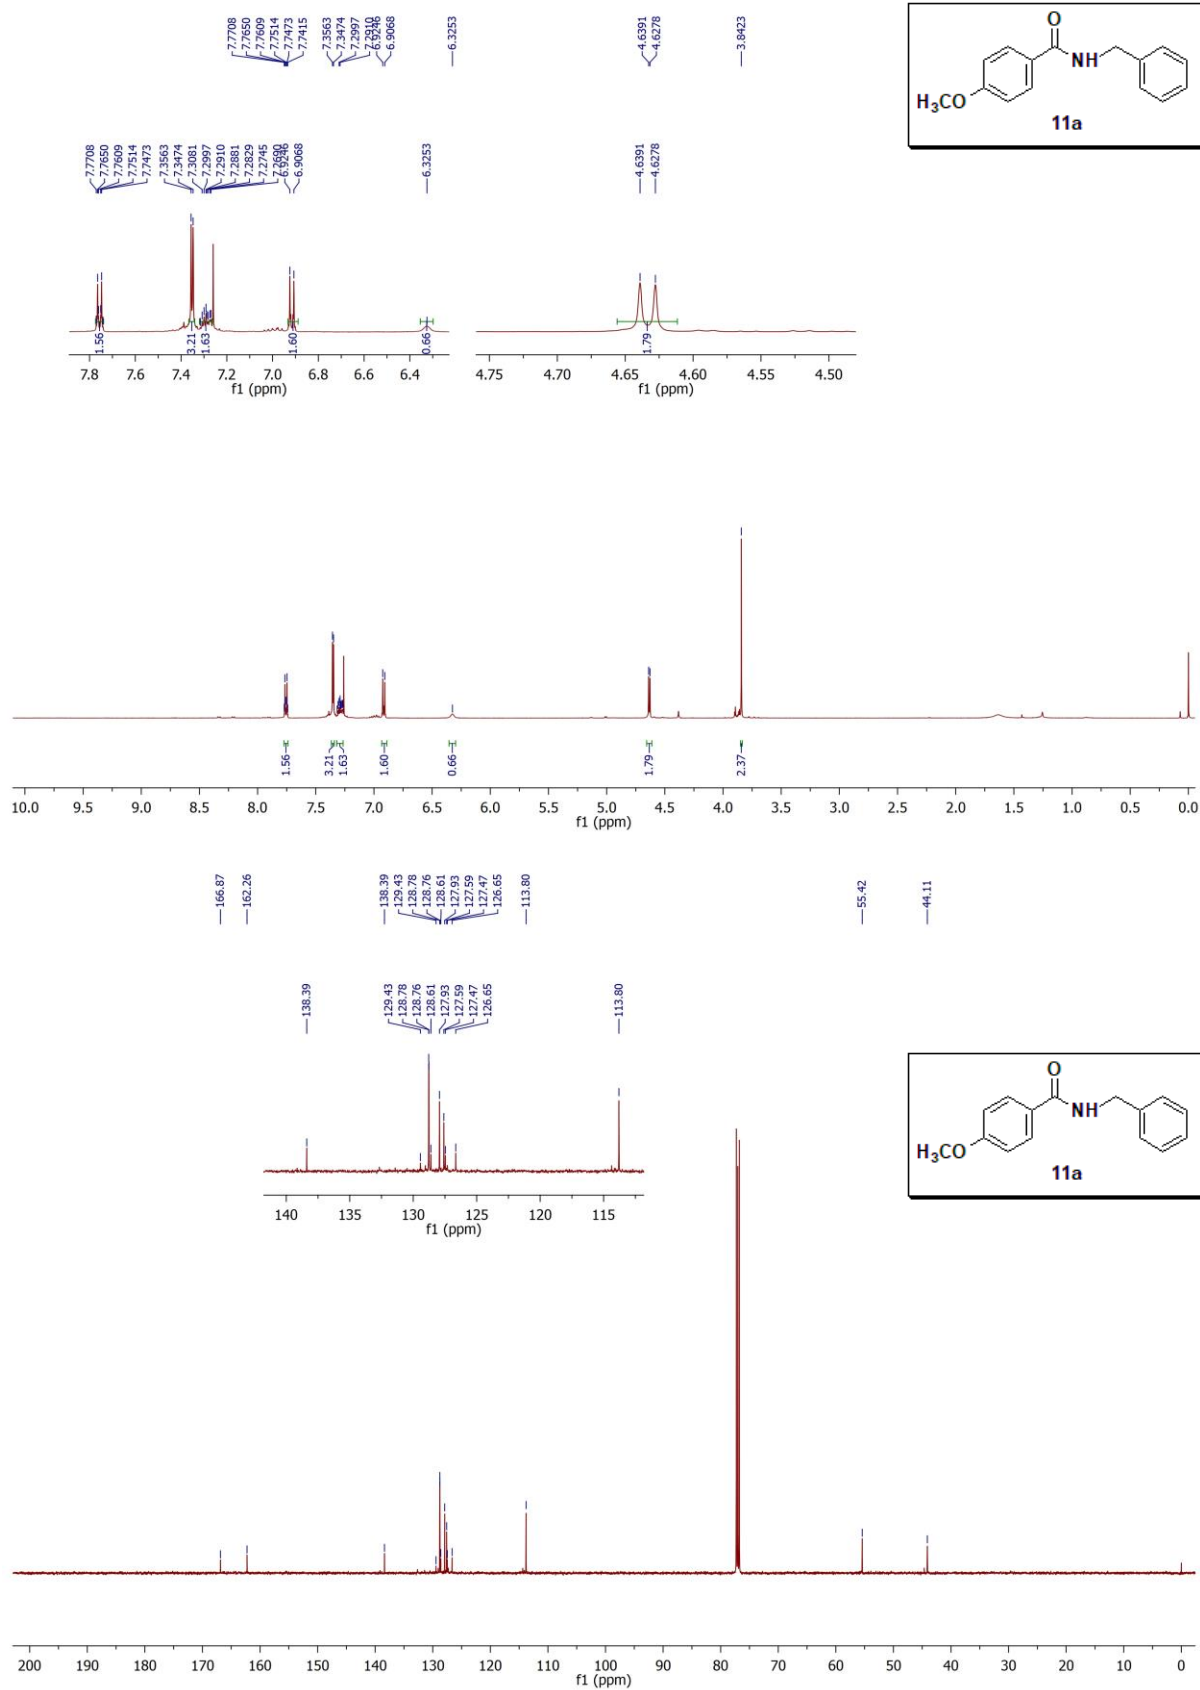

Figure S26:  $^1\text{H}$  and  $^{13}\text{C}$ -NMR spectra of N-Benzyl-4-methoxy-benzamide **11a** in  $\text{CDCl}_3$

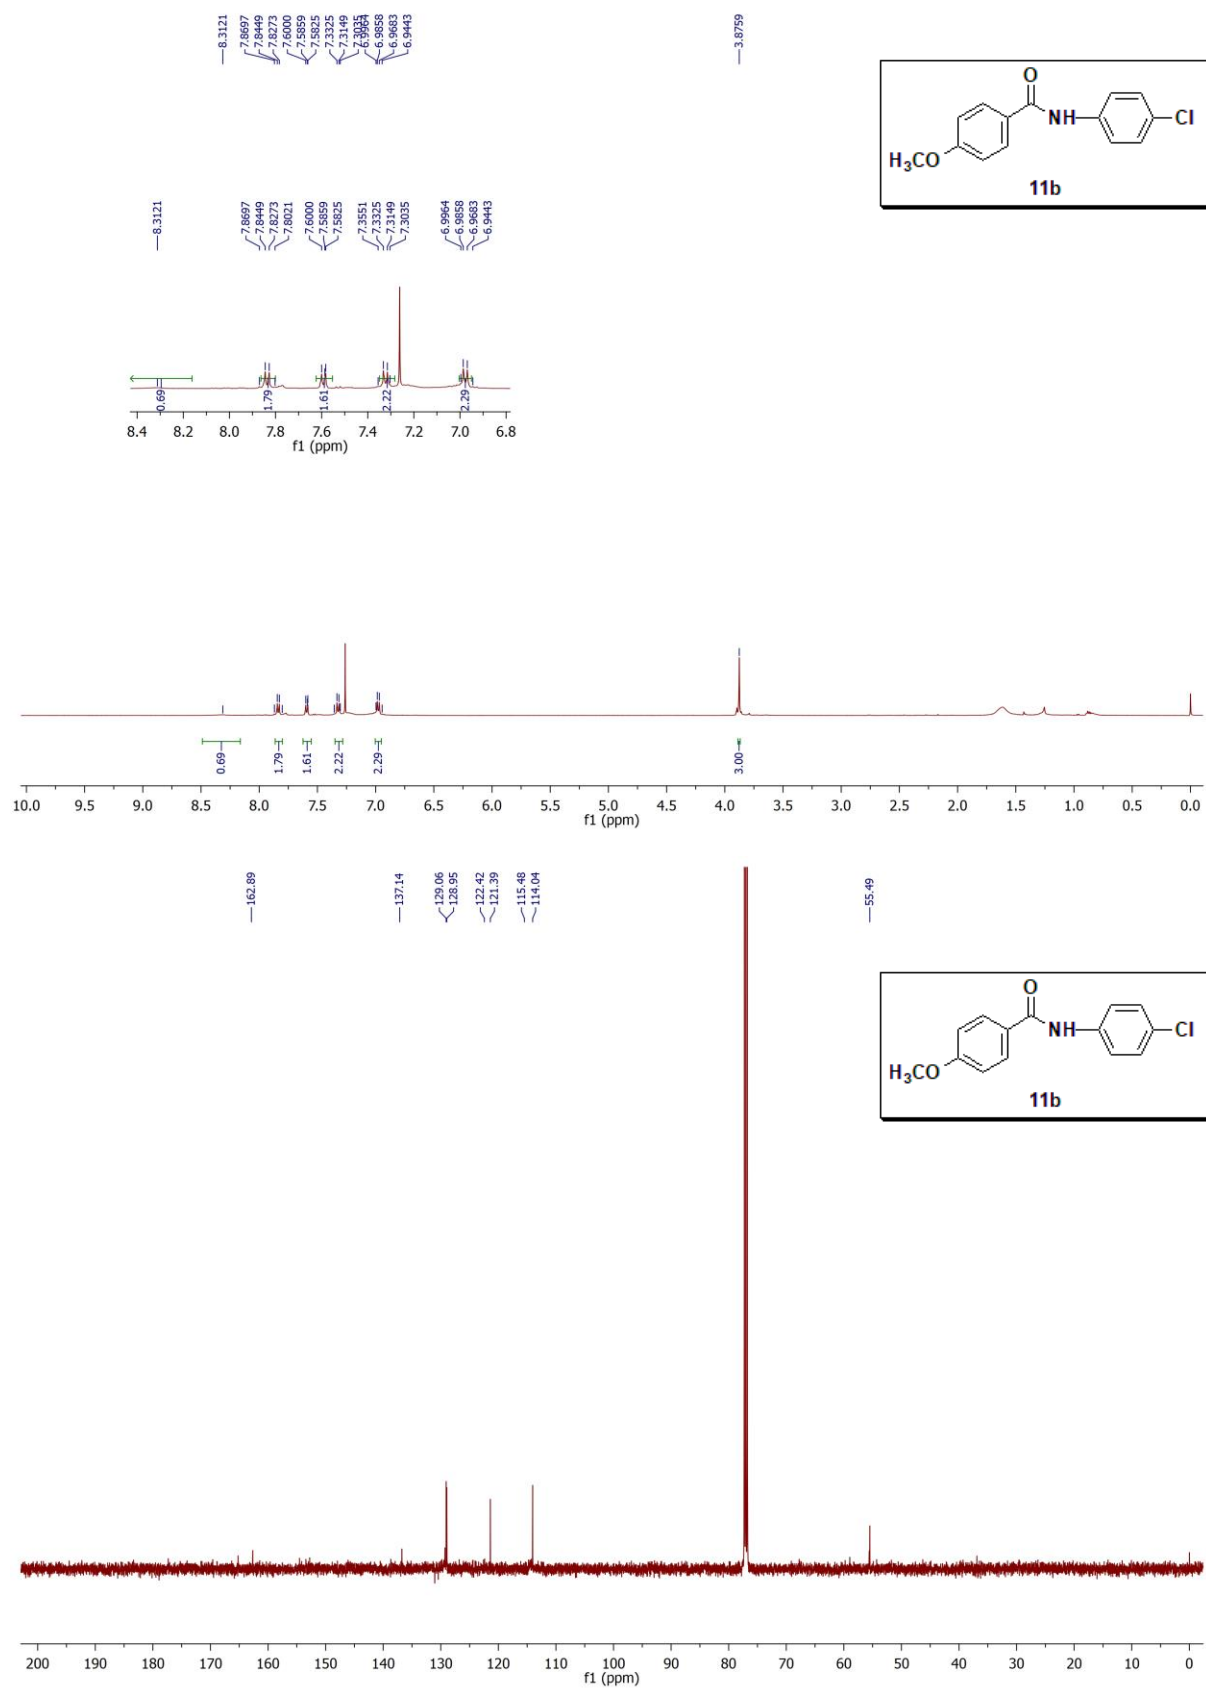

**Figure S27:** <sup>1</sup>H and <sup>13</sup>C-NMR spectra of N-Benzyl-benzamide **11b** in CDCl<sub>3</sub>

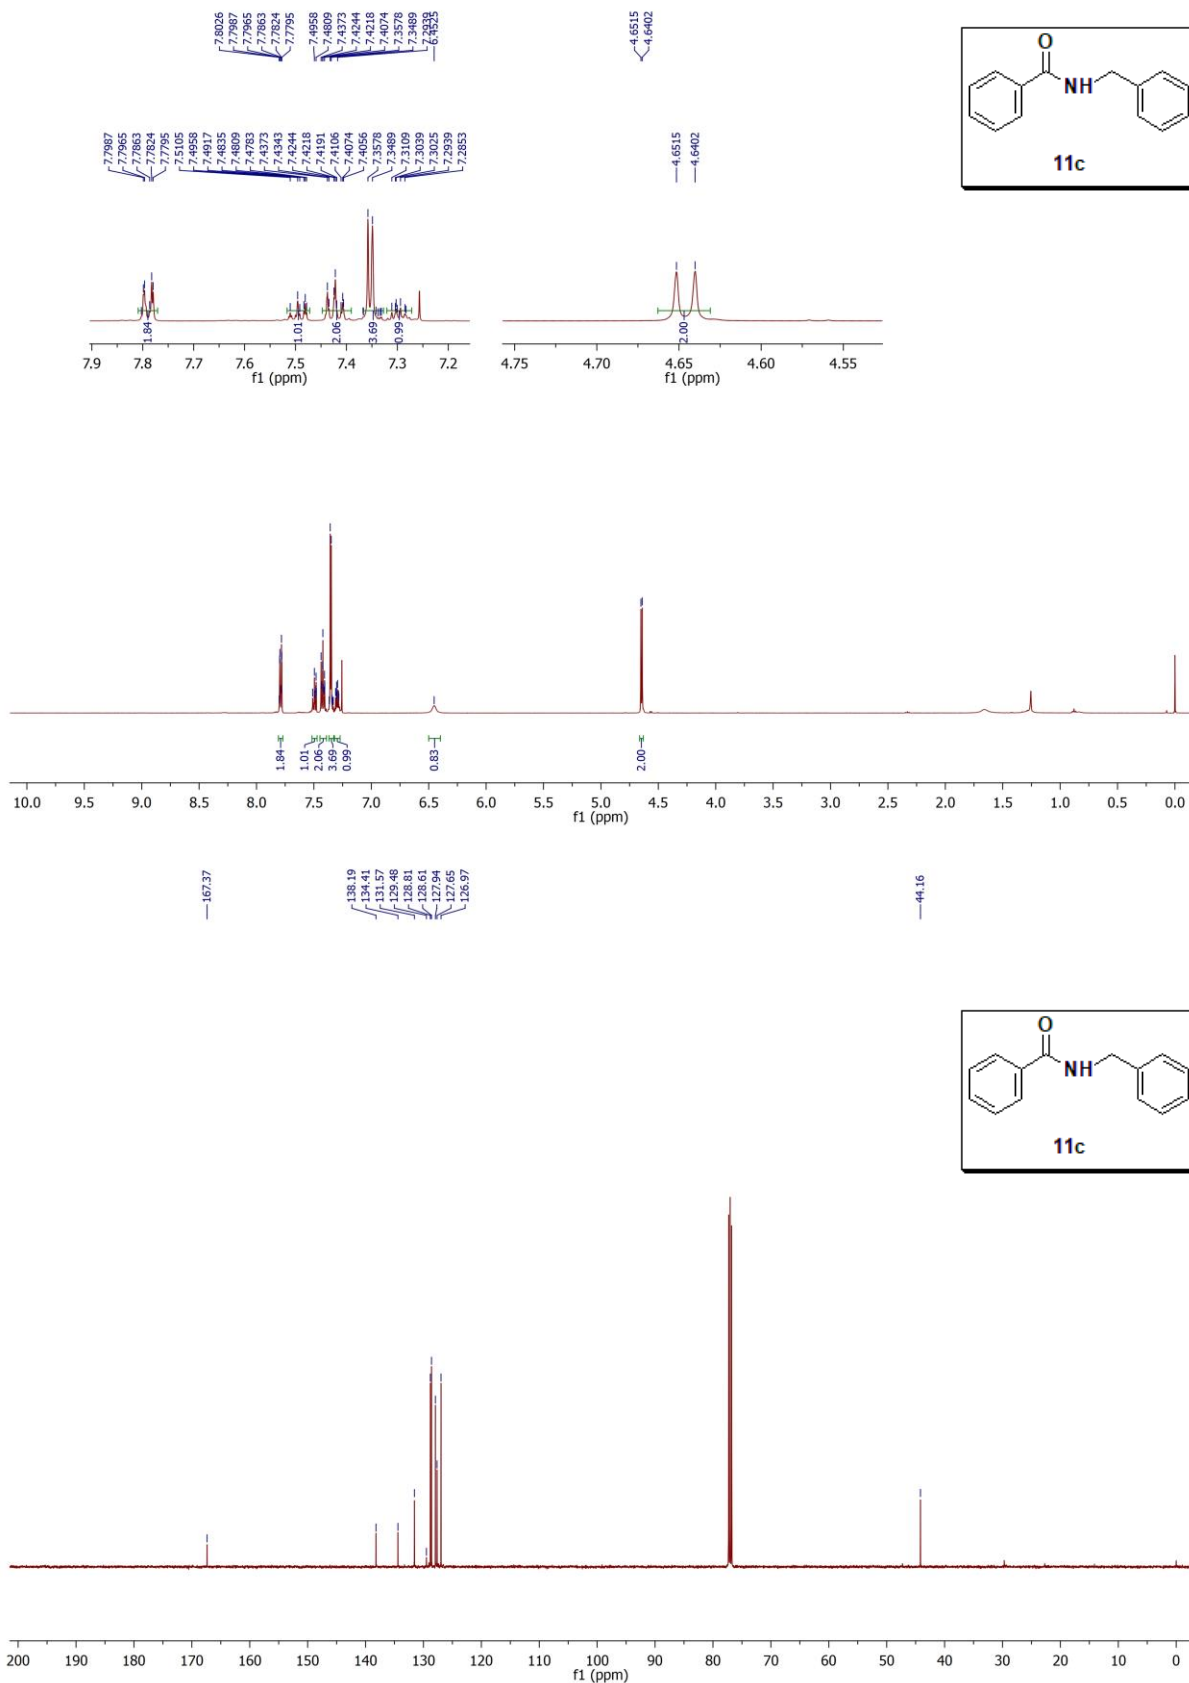

**Figure S28:** <sup>1</sup>H and <sup>13</sup>C-NMR spectra of N-(4-Chloro-phenyl)-4-methoxy-benzamide **11c** in CDCl<sub>3</sub>

## 5. ADME parameters

|                      | 5a     | 5b     | 5c     | 5d     | 5e     | 5f     | 8a     | 8b     | 8c     | 8d     | 8e     | 8f     | Ampicillin |
|----------------------|--------|--------|--------|--------|--------|--------|--------|--------|--------|--------|--------|--------|------------|
| MW                   | 431.51 | 461.53 | 465.95 | 461.53 | 491.56 | 491.56 | 415.44 | 445.47 | 449.89 | 445.47 | 475.49 | 479.91 | 349.4      |
| RB                   | 8      | 9      | 8      | 9      | 10     | 10     | 8      | 9      | 8      | 9      | 10     | 9      | 5          |
| HBA                  | 3      | 4      | 3      | 4      | 5      | 5      | 4      | 5      | 4      | 5      | 6      | 5      | 5          |
| HBD                  | 2      | 2      | 2      | 2      | 2      | 2      | 2      | 2      | 2      | 2      | 2      | 2      | 3          |
| TPSA                 | 102.76 | 111.99 | 102.76 | 111.99 | 121.22 | 121.22 | 87.74  | 96.97  | 87.74  | 96.97  | 106.2  | 96.97  | 138.03     |
| iLOGP                | 3.01   | 3.88   | 3.26   | 3.81   | 4.03   | 4.03   | 2.29   | 3.02   | 2.36   | 2.7    | 3.05   | 2.63   | 1.15       |
| GIA                  | High   | Low        |
| BBBP                 | No         |
| PGP                  | No     | Yes    | No     | Yes    | No         |
| CYP1A2 inhibitor     | No         |
| CYP2C19 inhibitor    | Yes    | No         |
| CYP2C9 inhibitor     | Yes    | No         |
| CYP2D6 inhibitor     | Yes    | No         |
| CYP3A4 inhibitor     | Yes    | No         |
| log Kp (cm/s)        | -5.84  | -6.04  | -5.61  | -6.04  | -6.25  | -6.25  | -6.17  | -6.37  | -5.93  | -6.37  | -6.57  | -6.14  | -9.23      |
| Lipinski #violations | 0      | 0      | 0      | 0      | 0      | 0      | 0      | 0      | 0      | 0      | 0      | 0      | 0          |
| Veber #violations    | 0      | 0      | 0      | 0      | 0      | 0      | 0      | 0      | 0      | 0      | 0      | 0      | 0          |
| Muegge #violations   | 0      | 0      | 0      | 0      | 0      | 0      | 0      | 0      | 0      | 0      | 0      | 0      | 0          |

**Figure S29:** ADME parameters of *cis*-3-aryyl-thiourea/urea- $\beta$ -lactams **5a-f/8a-f**

## 6. IC50 Graphs

### 6.1 IC50 graphs against *S. aureus*

IC50= 1.66  $\mu\text{g/ml}$

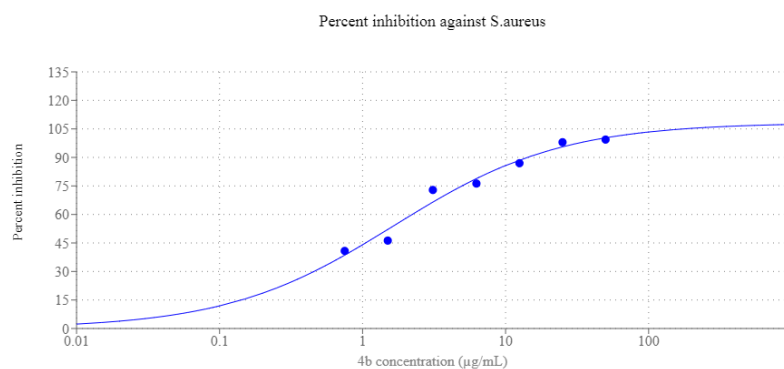

**Figure S30:** IC50 curve of compound **5b**.

IC50= 4.74  $\mu\text{g/ml}$

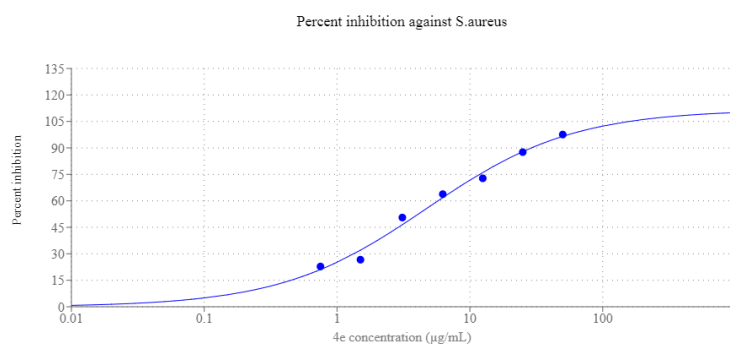

**Figure S31:** IC50 curve of compound **5e**.

IC50= 0.685  $\mu\text{g/ml}$

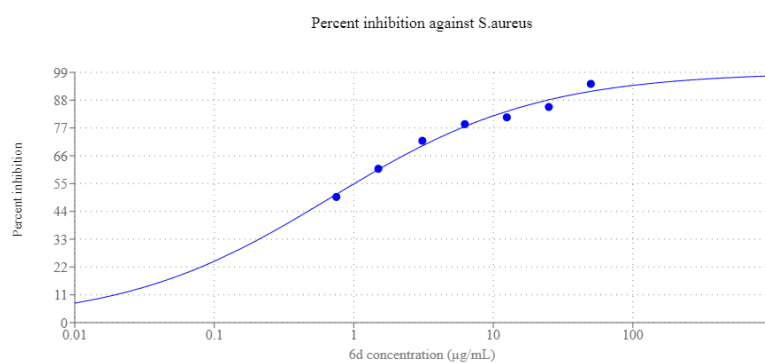

**Figure S32:** IC50 curve of compound **8d**.



IC<sub>50</sub> = 0.78 μg/ml

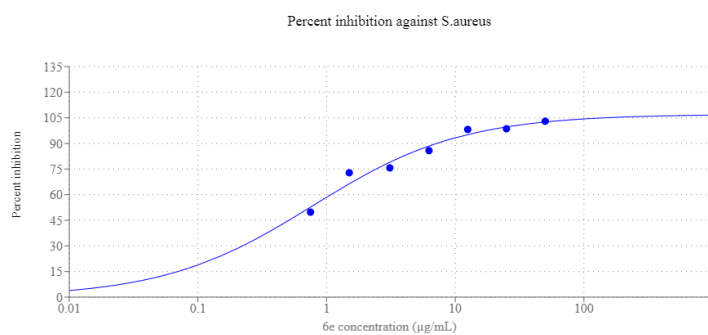

**Figure S33:** IC<sub>50</sub> curve of compound **8e**.

## 6.2 IC50 graphs against *B. cereus*

IC50= 2.19  $\mu\text{g/ml}$

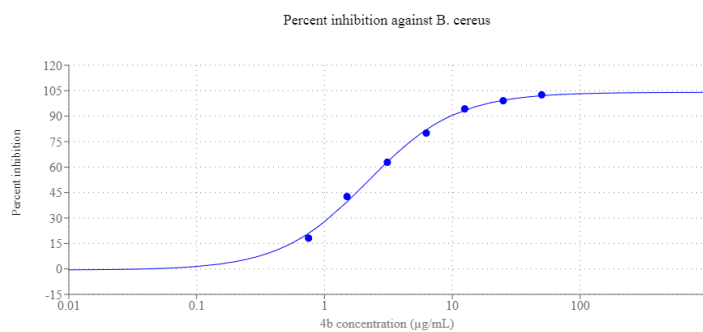

**Figure S34:** IC50 curve of compound 5b.

IC50= 3.45  $\mu\text{g/ml}$

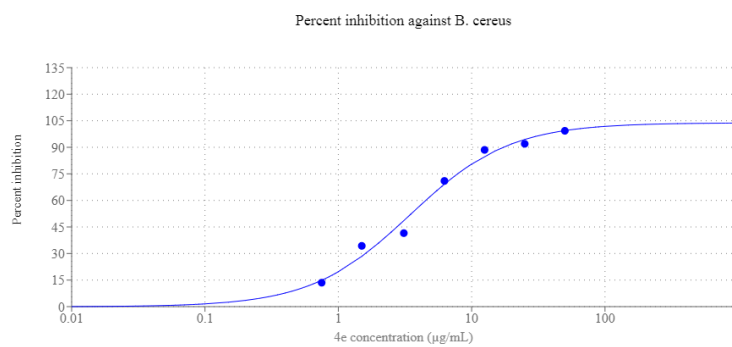

**Figure S35:** IC50 curve of compound 5e.

IC50= 1.11  $\mu\text{g/ml}$

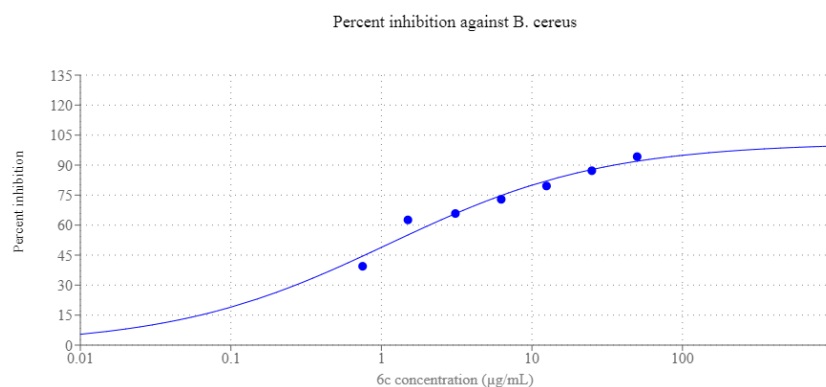

**Figure S36:** IC50 curve of compound 8c.

IC50= 1.21  $\mu\text{g/ml}$

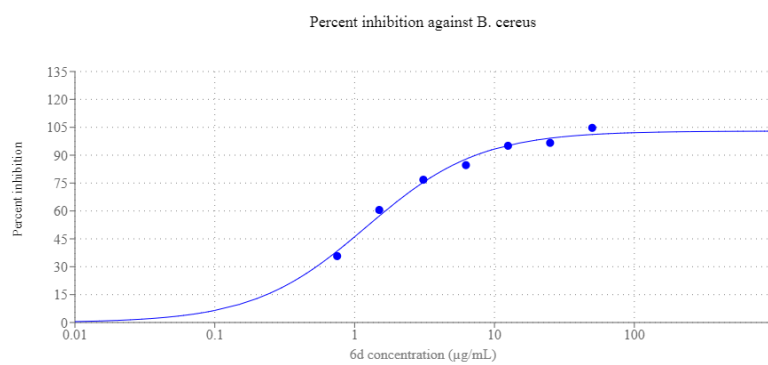

**Figure S37:** IC50 curve of compound **8d**.

IC50= 1.22  $\mu\text{g/ml}$

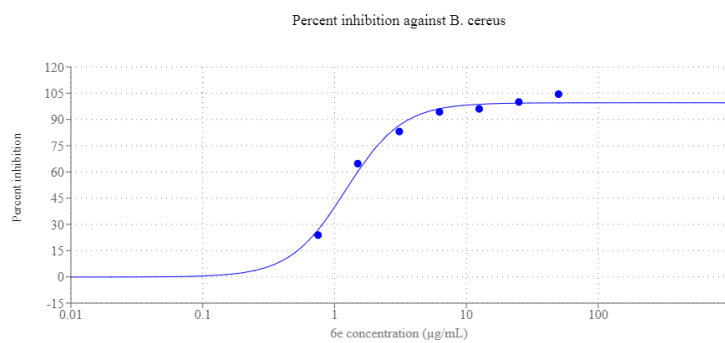

**Figure S38:** IC50 curve of compound **8e**.

### 6.3 IC50 graphs against *P. aeruginosa*

IC50= 0.95  $\mu\text{g/ml}$

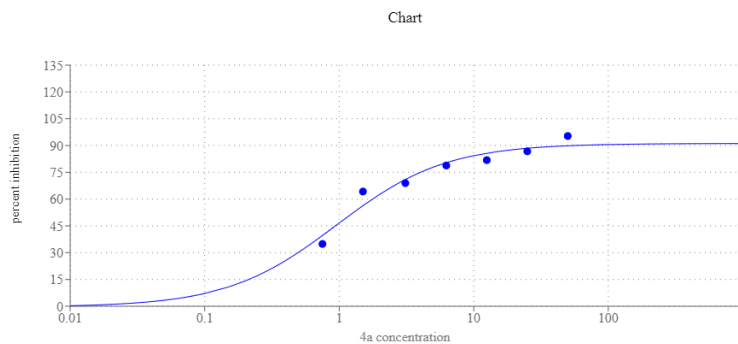

**Figure S39:** IC50 curve of compound 5a.

IC50= 1.31  $\mu\text{g/ml}$

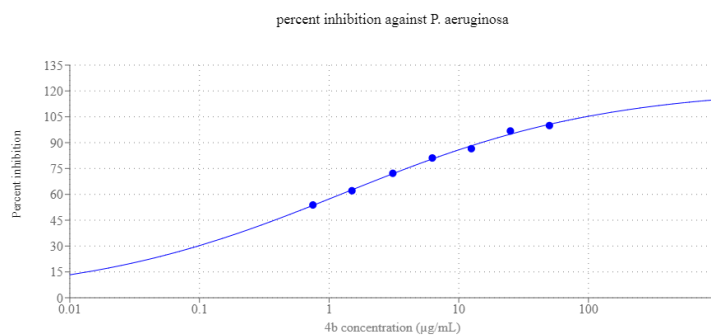

**Figure S40:** IC50 curve of compound 5b.

IC50= 0.57  $\mu\text{g/ml}$

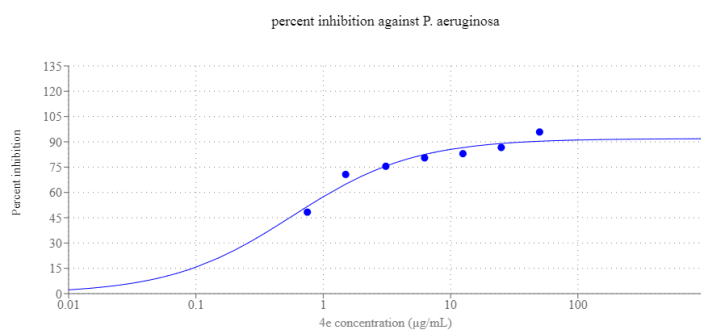

**Figure S41:** IC50 curve of compound 5e.

IC50= 0.91  $\mu\text{g/ml}$

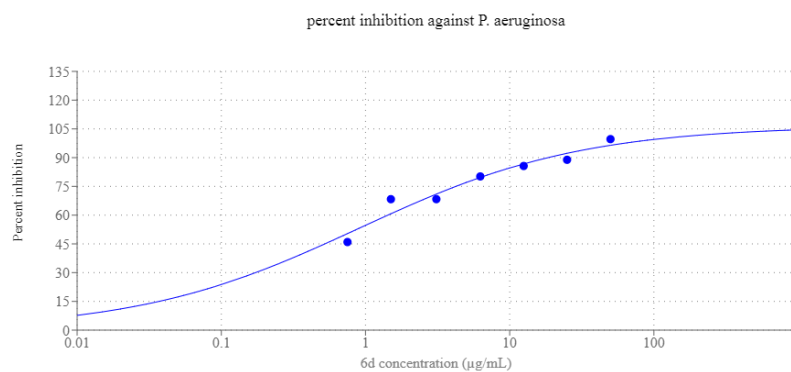

**Figure S42:** IC50 curve of compound **8d**.

IC50= 0.72  $\mu\text{g/ml}$

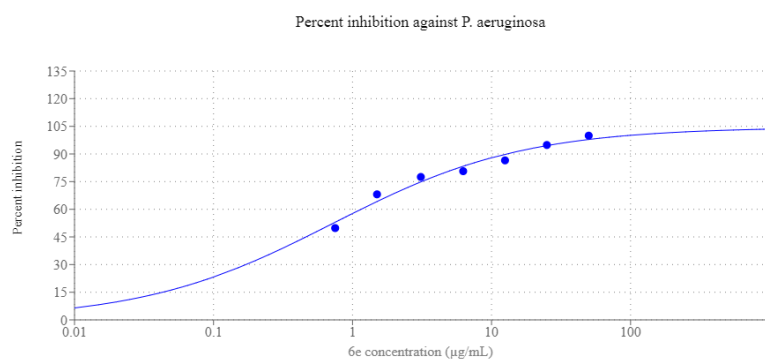

**Figure S43:** IC50 curve of compound **8e**.

## 6.4 IC50 graphs against *E. coli*

IC50= 1.92  $\mu\text{g/ml}$

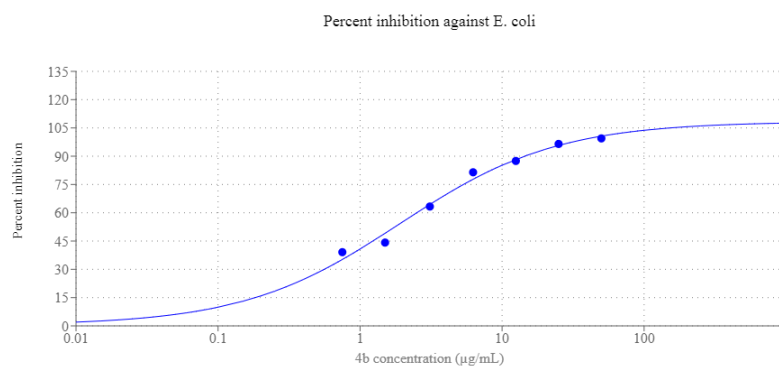

**Figure S44:** IC50 curve of compound **5b**.

IC50= 3.2  $\mu\text{g/ml}$

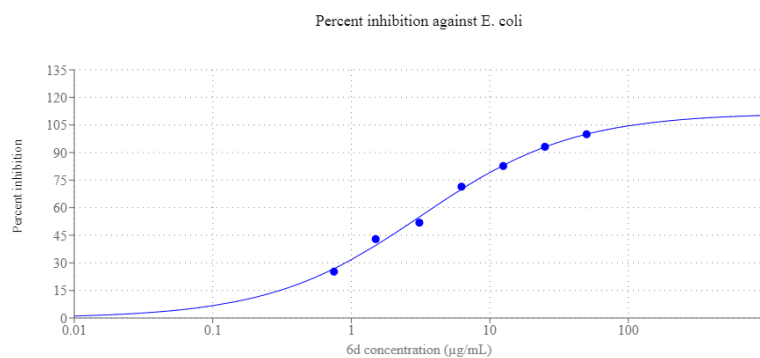

**Figure S45:** IC50 curve of compound **8d**.

IC50= 1.97  $\mu\text{g/ml}$

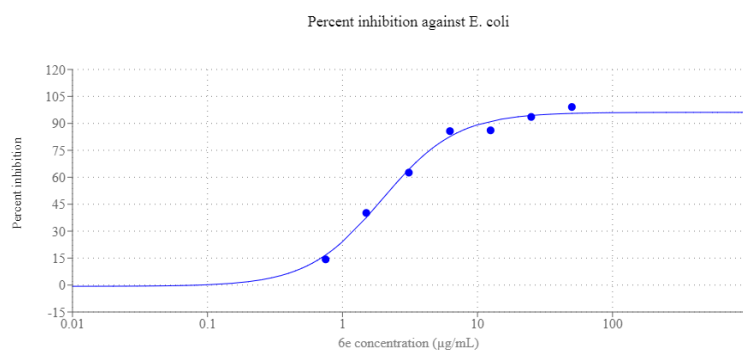

**Figure S46:** IC50 curve of compound **8e**.

## 6.5 IC50 graphs against *C. albicans*

IC50= 3.5  $\mu\text{g/ml}$

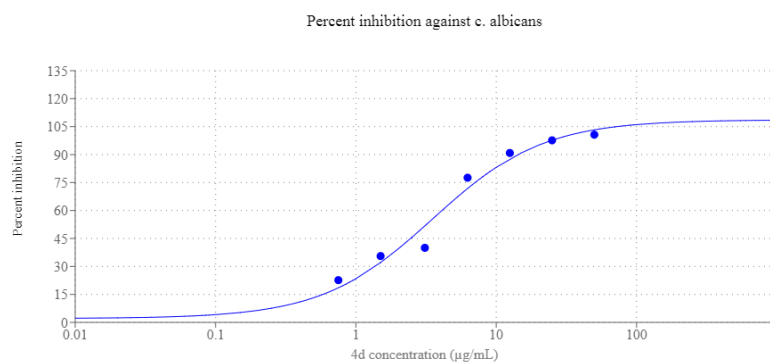

**Figure S47:** IC50 curve of compound **5d**.

IC50= 10.84  $\mu\text{g/ml}$

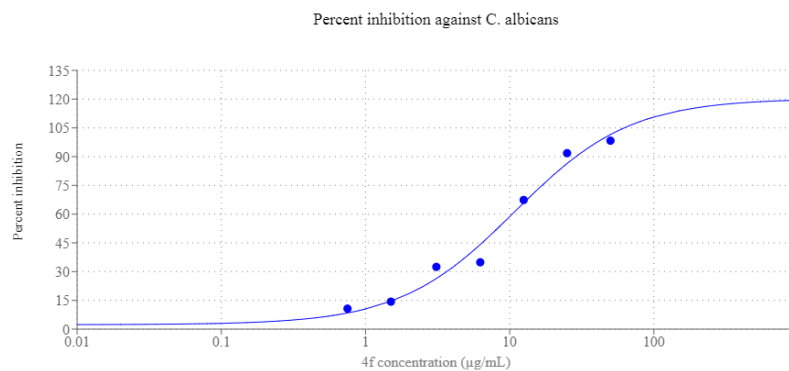

**Figure S48:** IC50 curve of compound **5f**.

IC50= 6.25  $\mu\text{g/ml}$

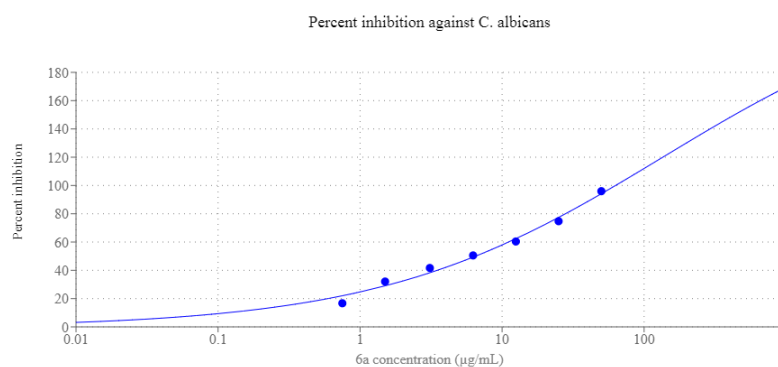

**Figure S49:** IC50 curve of compound **8a**.

IC50= 2.02  $\mu\text{g/ml}$

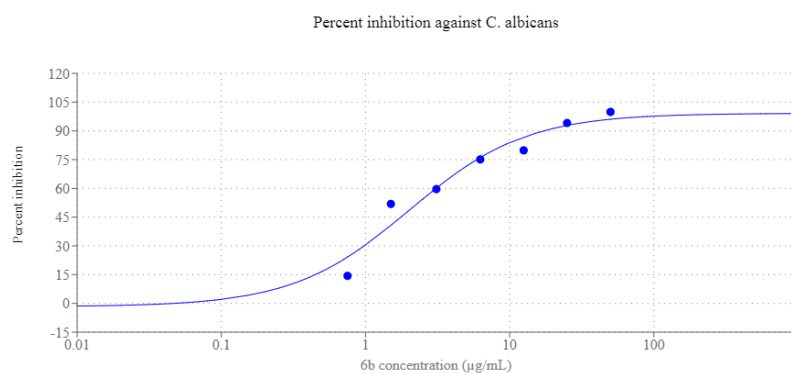

**Figure S50:** IC50 curve of compound **8b**.

IC50= 2.61  $\mu\text{g/ml}$

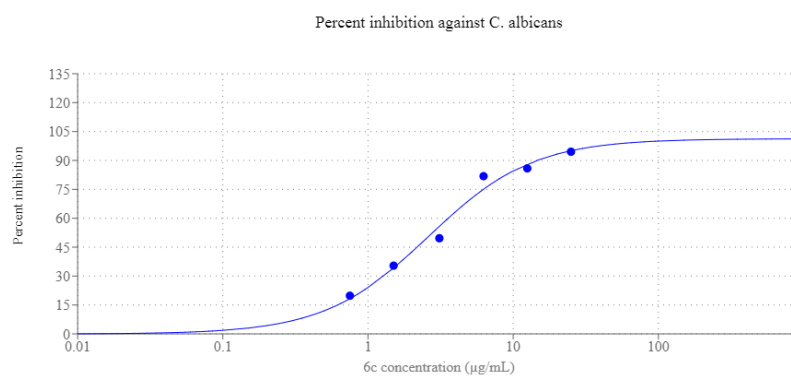

**Figure S51:** IC50 curve of compound **8c**.

IC50= 0.42  $\mu\text{g/ml}$

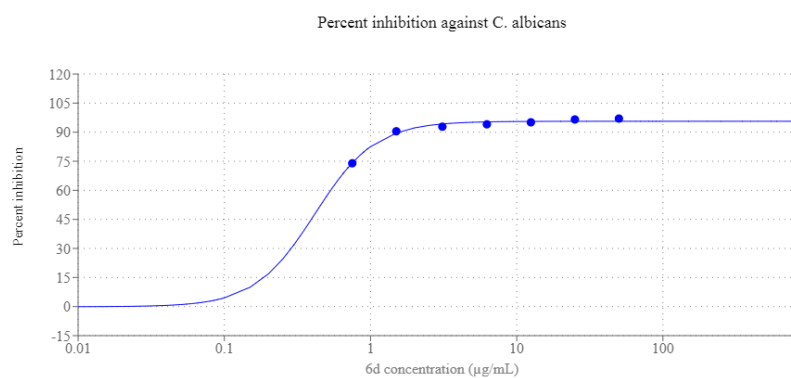

**Figure S52:** IC50 curve of compound **8d**.



IC50= 0.88  $\mu\text{g/ml}$

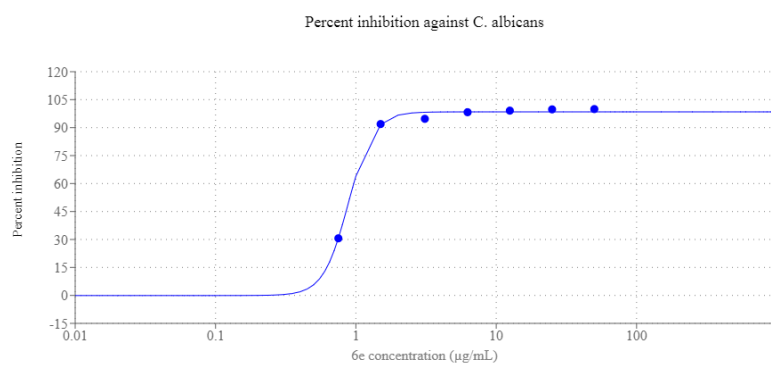

**Figure S53:** IC50 curve of compound **8e**.

IC50= 1.28  $\mu\text{g/ml}$

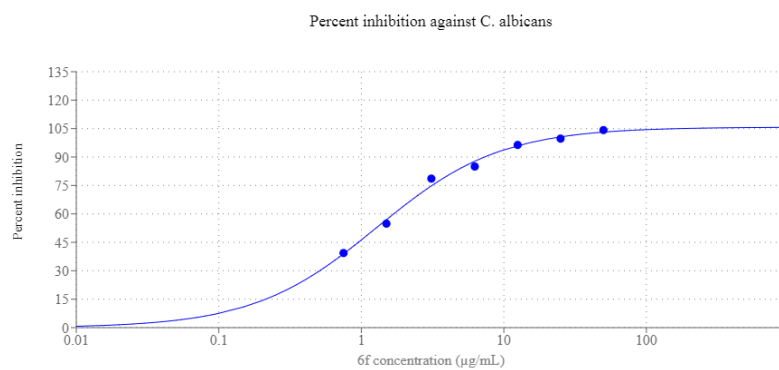

**Figure S54:** IC50 curve of compound **8f**.

## 6.6 IC50 graphs against *C. tropicalis*

IC50= 1.6  $\mu\text{g/ml}$

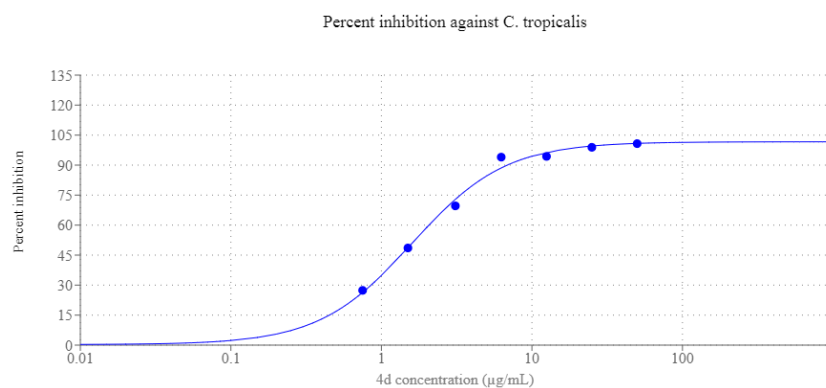

**Figure S55:** IC50 curve of compound **5d**.

IC50= 2.21  $\mu\text{g/ml}$

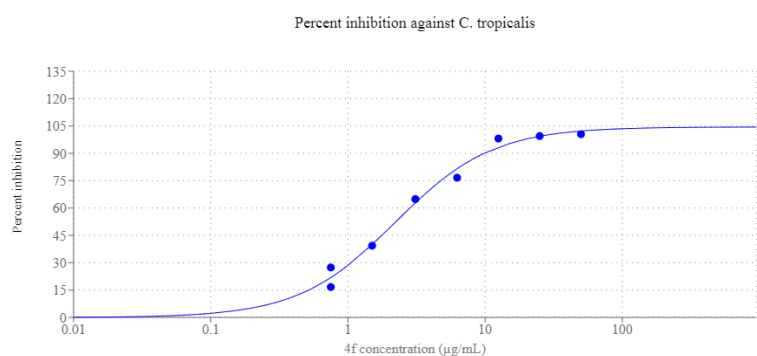

**Figure S56:** IC50 curve of compound **5f**.

IC50= 4.58  $\mu\text{g/ml}$

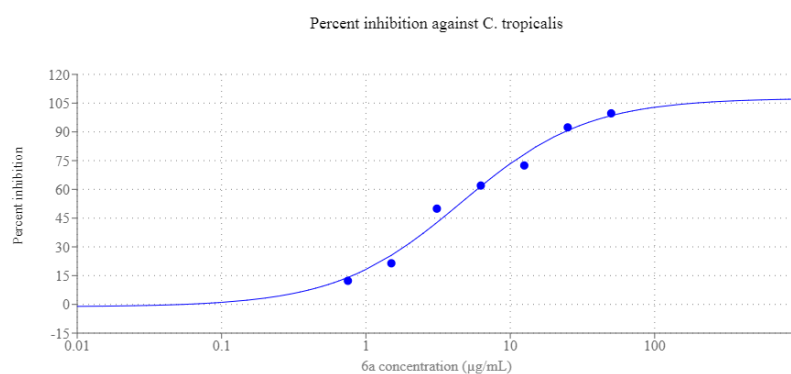

**Figure S57:** IC50 curve of compound **8a**.

IC50= 0.92  $\mu\text{g/ml}$

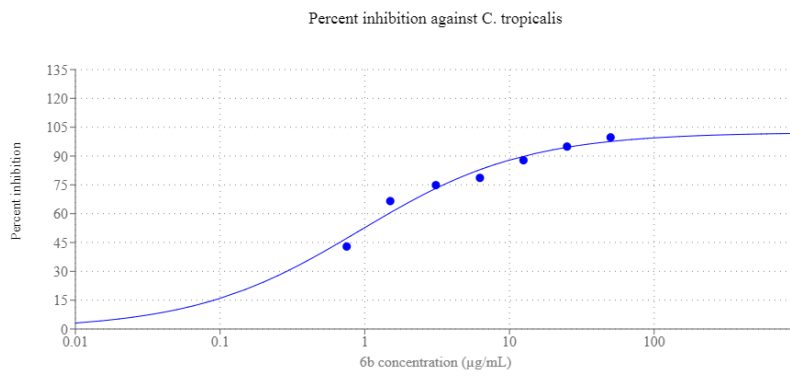

**Figure S58:** IC50 curve of compound **8b**.

IC50= 7.38  $\mu\text{g/ml}$

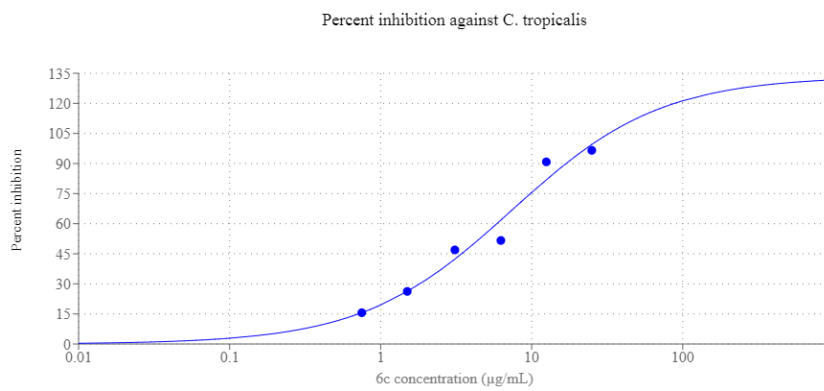

**Figure S59:** IC50 curve of compound **8c**.

IC50= 0.27  $\mu\text{g/ml}$

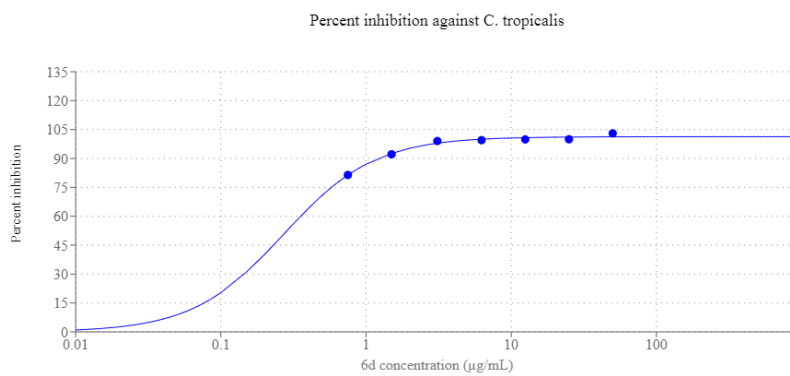

**Figure S60:** IC50 curve of compound **8d**.

IC50= 0.75  $\mu\text{g/ml}$

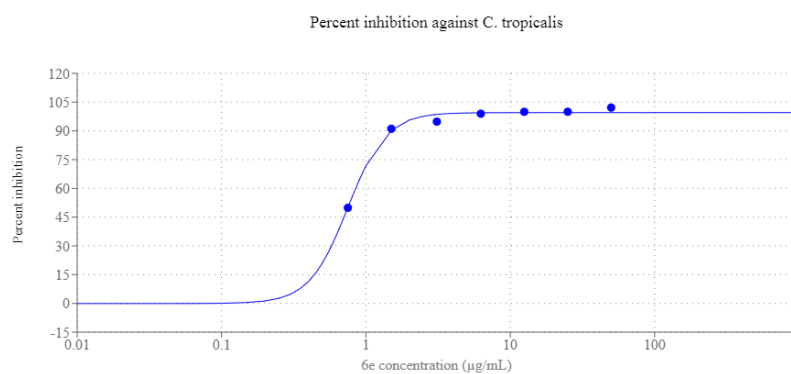

**Figure S61:** IC50 curve of compound **8e**.

IC50= 0.997  $\mu\text{g/ml}$

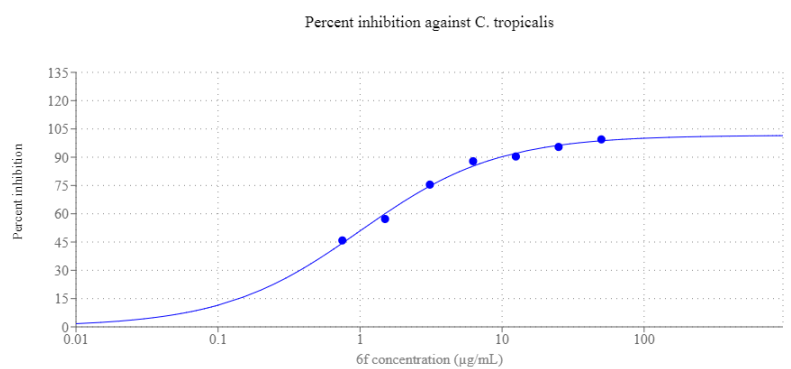

**Figure S62:** IC50 curve of compound **8f**.
